# Supplementary material for: A limit on the evolutionary rescue of an Antarctic bacterium from rising temperatures
Source: PubMed Central journal article supplement — Sci Adv. 2022 Jul 15;8(28):eabk3511. doi: 10.1126/sciadv.abk3511 (PMC9286510; doi:10.1126/sciadv.abk3511), 2022-07-15
Supplement: sciadv.abk3511_sm.pdf [file sciadv.abk3511_sm.pdf]

## Supplementary Materials for

### **A limit on the evolutionary rescue of an Antarctic bacterium from rising temperatures**

Macarena Toll-Riera *et al.*

Corresponding author: Macarena Toll-Riera, [mtollriera@gmail.com](mailto:mtollriera@gmail.com); Andreas Wagner, [andreas.wagner@ieu.uzh.ch](mailto:andreas.wagner@ieu.uzh.ch)

*Sci. Adv.* **8**, eabk3511 (2022)  
DOI: 10.1126/sciadv.abk3511

#### **The PDF file includes:**

- Supplementary Text
- Supplementary Methods
- Figs. S1 to S15
- Tables S1 to S13
- Legends for data S1 to S3
- References

#### **Other Supplementary Material for this manuscript includes the following:**

- Data S1 to S3

## Supplementary Text

### Genetic changes implicated in temperature adaptation

Genetic variants that accumulate at different temperatures affect genes classified into different COG (Clusters of Orthologous Groups (64)) functional categories. In control populations evolving at 15°C, and in clones adapted to temperatures ranging between 22°C and 26°C such variants preferentially accumulate in genes involved in motility and signal transduction. In contrast, adaptation to high temperatures, 28°C and 30°C, is preferentially associated with variants of genes involved in protein turnover and chaperone functions, in cell wall/membrane biogenesis, and in energy production and conversion (Fisher test, one-tailed FDR corrected p-value  $\leq 0.05$ ) (Fig. S6, Table S4).

In general, the proteomes of psychrophiles harbor fewer aliphatic amino acids (40) and their protein core is less hydrophobic to reduce its compactness (73). Because the amino acid composition of proteins varies with temperature (40), it can help us understand the selective pressures acting during experimental evolution. We observed that at 30°C the amino acids that changed during experimental evolution most frequently into other amino acids are glycine, alanine and serine. The most commonly changing amino acids at other temperatures are as follows. 28°C: serine, arginine, alanine and asparagine; 26°C: glycine, alanine and asparagine; 22°C: alanine; 15°C: arginine and methionine (Table S5). Previous studies suggest that the proteomes of psychrophiles harbor more small amino acids (such as glycine, alanine and serine) than those of mesophiles, possibly to increase protein flexibility (40). It is therefore remarkable that glycine, alanine and serine are also the most commonly mutated amino acids at 30°C.

Conversely, at high temperatures (30°C and 28°C) amino acids encoded by genes in the ancestor most frequently turn into leucine and isoleucine (Table S6). These are both aliphatic amino acids that help to maintain the stability of the protein core by increasing internal hydrophobic interactions (40). Among the least frequently gained amino acids is alanine, which as mentioned before, is a small amino acid that increases protein flexibility.

### Highly parallel mutations are concentrated in few genes and genomic regions

The two most common mutations in our experiment, mutations in *lon* and mutations that reduce the number of copies of chromosome 2, increase their frequency with temperature (Fig. 2B, Fig. S9). Mutations in *lon* appear for the first time at the sublethal 28°C, where only 17% of clones have a mutation affecting this gene. By the time populations are exposed to 30°C, 90% of clones harbor a *lon* mutation. Similarly, mutations that decrease the number of chromosome 2 copies also increase with temperature. While only one clone adapted to 26°C carries this mutation, 46.7% of the clones adapted to 28°C, and 87.5% of clones adapted to 30°C carry it.

Mutations in cell wall biosynthesis are the third most common mutations (85%) in populations adapted to 30°C. The most commonly mutated membrane related genes at high temperatures are *mipA*, *lpxC* and *lapB*. *mipA* encodes for the MltA-interacting protein, an integral outer membrane scaffold protein that forms a complex with two other proteins, MrcB and MltB. This complex is involved in the growth of the murein sacculus (or peptidoglycan exoskeleton), a bag-shaped structure around the cytoplasmic membrane that maintains cell shape by protecting cells from stress, and by helping to avoid cell lysis caused by osmotic pressure (74, 75). Osmotic pressure and the resulting danger of cell lysis increase with temperature, a problem that might be

overcome by mutations that modulate peptidoglycan synthesis. The genes *lpxC* and *lapB* encode UDP-3-O-acyl-N-acetylglucosamine deacetylase and lipopolysaccharide assembly protein B, respectively, both of which are important for the synthesis of lipid A, which anchors the lipopolysaccharides in the plasma membrane (76). The gene *lapB* regulates *lpxC*, and is also involved in the synthesis of lipopolysaccharides in the plasma membrane (76). Possibly, mutations in *lpxC* and *lapB* might affect outer membrane fluidity, which increases with temperature. Previous studies reported that the structure of lipid A is affected when *P. haloplanktis* is grown at 25°C (77). Other commonly mutated genes are involved in phospholipid metabolism (*pgsA*), in peptidoglycan biosynthesis and cell wall elongation (*mrdB*), as well as in the insertion of proteins in the outer membrane (*bamA*). Mutations involved in peptidoglycan synthesis also occur in *E. coli* adapting to high temperatures (22).

Mutations in cell wall biosynthesis genes appear for the first time at 26°C, where they are already present in 50% of the clones. At 28°C 97% of clones carry such mutations, whereas at 30°C the percentage of such clones falls slightly to 85%. This implies that not all mutations affecting cell wall biosynthesis identified at 28°C were fixed at that time.

More than half (61.25%) of the populations adapted to 30°C have a mutation involved in energy conversion, specifically in one of the subunits of the F-ATPase. F-type ATPases have two domains. The first is F<sub>0</sub>, which is a proton channel integral to the membrane and has 3 subunits (α<sub>1</sub>, β<sub>2</sub>, c), and the second is F<sub>1</sub> which is the catalytic core and has 5 subunits (α<sub>3</sub>, β<sub>3</sub>, γ<sub>1</sub>, δ<sub>1</sub>, ε<sub>1</sub>) (78). Remarkably, mutations in the F-ATPase only appear at 30°C and most of them are in the α and β subunits of the F<sub>1</sub> domain. We speculate that these mutations help cells cope with the high energetic demands of Lon protease, which requires ATP, and with the energetic demands caused by an increased metabolic rate at high temperature.

Other common genetic variants affect signal transduction (Fig. 2B, Fig. S9, Table S8), but in contrast to the previously mentioned mutations, their incidence at 30°C is no higher than at other temperatures.

#### Chromosome 2 duplication and its role for adaptation to high temperature

87.5% of the clones adapted to 30°C have mutations that reduce the number of chromosome 2 copies from two – acquired during preadaptation – back to one. Chromosome 2 is thought to have its origin in a plasmid, because it still carries plasmid related genes such as genes involved in plasmid replication (a *repA*-like gene), plasmid partition (*parA* and *parB*) and plasmid maintenance (*kisB*, *kidB*) (34).

Mutations to reduce the number of copies of chromosome 2 back to one can follow two alternative genetic routes (Fig. S7), which we confirmed using qPCR experiments (Fig. S8, Table S7). Some clones harbor non-synonymous point mutations in the *repA* gene, a gene involved in plasmid replication located on chromosome 2. Mutations in this gene lead to a reduction in the number of copies of chromosome 2 back to one (Fig. S8, Table S7). Other clones harbor a deletion affecting almost the entire chromosome 2, which results in two chromosomes 2, one of normal size and a small one containing only few genes, including the ones needed for plasmid replication (*repA*) and maintenance (among others, *parA* and *parB* genes which are essential for plasmid partition) (Fig. S8, Table S7). The genes involved in the

metabolism of D-gluconic acid fall in the deleted region. While the copy number of *repA* and *parA* genes in these clones is two-fold larger than in the wild-type clone (Tukey post-hoc test, p-value < 0.05), this is not the case for the gluconate transporter gene, which has the same copy number as the wild-type clone (Tukey post-hoc test, p-value = 0.952) (Fig. S8, Table S7). This observation shows that the second mutational route causes the partial deletion of one of the two copies of chromosome 2. This deletion is associated with increased growth compared to clones with mutations in *repA* ( $r_{del}=0.484$  vs  $r_{repA}=0.422$ , Wilcoxon rank sum test, one-tailed p-value=0.035), and compared to clones with no mutations in chromosome 2 or *repA* ( $r_{del}=0.484$  vs  $r_{nomut}=0.372$ , Wilcoxon rank sum test, one-tailed p-value=0.010).

Both genetic routes reduce the expression of 546 (13.5%) of the organism's genes. The reduction thus lessens the energetic burden of protein biosynthesis, which consumes up to 50% of the total energy budget of growing bacteria (79). More importantly, the reduction also eases the energetic burden of protein folding or re-folding (five ATP molecules per protein (80)), and of the even more costly degradation of misfolded proteins (two ATP molecules per peptide bond cleavage for Lon protease (81)). Additionally, it also lessens the fitness cost of accumulating misfolded proteins inside the cell (43).

#### Protein misfolding limits adaptation to high temperature

The Lon protease is composed of three domains, the N-terminal domain, the AAA+ domain and the protease domain (41). Structural information reveals that the protease is a homohexamer that forms a ring with a central cavity. Protomers (i.e. monomers) with bound ATP alternate with protomers in a nucleotide-free state (82). ATP binding and hydrolysis causes large conformational changes that induce the movement of two groups of conserved residues located in the AAA+ domain, which are called pore loop residues. It has been hypothesized that the pore loops bind the protein substrate, and that these movements unfold and translocate the substrate through the central cavity for its degradation (82).

The three amino acid insertion we observed during experimental evolution occurs at the end of the N-terminal domain, in a region named the three-helix bundle. It occurs between helix two and three, and increases the separation between the two helices (Fig. 3A). The three-helix bundle region rotates when ATP binds (82). Before ATP binding, the three-helix bundle and the pore loops are oriented away from the central axis. After ATP binding the three-helix bundle and the pore loops rotate to face the center of the ring (82). Because rotation of pore loops has been suggested to bind and translocate the protein substrate (82), it is tempting to speculate that the three amino acid insertion creates an additional loop to interact with the substrates and facilitate their translocation and degradation. The affected region is not highly conserved at the amino acid level in Bacteria and Archaea (Fig. S15), and the three amino acid insertion is not present in any other known organism. Aside from the three amino acid insertion, all other mutations in the Lon protease except one fall in the N-terminal domain (Fig. S15, Table S9).

#### Adaptation to high temperature does not entail fitness costs at 20°C

Evolution experiments in *E. coli* have shown that adaptation to temperature can be costly (83, 84), for example by decreasing growth at lower temperatures (84), but such costs are not universal (18, 28, 85).

In our experiment clones adapted to 30°C accumulated mutations that affect very important cellular functions, such as bacterial cell wall biosynthesis. To find out whether these mutations can compromise growth at 20°C, the temperature we used to start the experiment, we grew each of the clones adapted to 30°C at 20°C for 24 hours. Surprisingly, all clones adapted to 30°C were able to grow at 20°C, and in some cases, they even grew better than the ancestral clone at 20°C (Fig. S4). A likely explanation is that most clones carry mutations that are general adaptations to the experimental conditions because we find them both in control populations and in populations adapted to different temperatures (Fig. S6, Fig. S9). Examples of these mutations are mutations affecting the two-component system response regulator UvrY (PSHA\_RS11640) and the bifunctional diguanylate cyclasephosphodiesterase (PSHA\_RS16945). In sum, adaptation to high temperatures (30°C) does not compromise growth at lower temperatures (20°C).

## Supplementary Methods

### Quantitative PCR (qPCR) experiments to confirm the different mutational routes to reduce the number of copies of chromosome 2

We used a set of six genes to study the different mutational routes followed by clones to reduce the number of copies of chromosome 2 from 2 back to 1. Specifically, we used three housekeeping genes located on chromosome 1 (*gyrA*, *rpoB*, *recA*) and three genes located on chromosome 2 (*repA*, *parA*, gluconate transporter) (Table S13). We studied the copy number of these genes in the following 12 clones. The first clone was the *P. haloplanktis* TAC125 wild-type clone, in which we expect only one copy of the three genes located on chromosome 2 to exist. The second clone was the *P. haloplanktis* preadapted clone used to start the evolution experiment (contains the duplication of chromosome 2), in which we expect two copies of the three genes located on chromosome two. Third, we selected a group of three clones that carry the chromosomal duplication and were isolated at different temperatures (22°C-19, 26°C-9, 28°C-23). Fourth, we selected four clones that all carry mutations in the *repA* gene (28°C-10, 30°C-9.2, 30°C-15.1, 30°C-30.1), and in which we expect one copy of the three genes located on chromosome 2. Lastly, we selected three clones with one of the two copies of chromosome 2 partially deleted (28°C-11, 30°C-8.3, 30°C-26.2). The partial deletion affects almost the entire chromosome 2 except few genes (among them *repA* and *parA*). We thus expect two copies of *repA* and *parA*, and one copy of the gluconate transporter to exist in these clones.

We designed primer pairs for qPCR with Primer3Plus (86), and used a conventional PCR with Thermopol Taq polymerase (Thermo Fisher Scientific) to confirm the amplification of a single band of the desired size. We determined the optimal primer and genomic DNA concentration, as well as the efficiency of the primer pair by qPCR using a pool of the gDNAs to be tested. We carried out the qPCR reactions in triplicates in 96-well plates (Applied Biosystems), using the Fast SYBR Green Mastermix (Thermo Fisher Scientific), and quantified amplification in a StepOnePlus instrument (Applied Biosystems). Each plate contained 4 replicates of NTC (non-template control). The qPCR conditions were as follows: an initial denaturation step (95°C, 20 sec) followed by 40 cycles of denaturation (95°C, 3 sec) and annealing and extension (60°C, 30 sec). After each run, we recorded a melt curve from 60°C to 95°C, increasing the temperature by 0.5°C every 15 sec. We performed relative quantification qPCR to compare amplification of a gene in different evolved populations of *P. haloplanktis* using the *P. haloplanktis* TAC125 wild-type strain as a control. We used qBASE+ 3.2 (87) to analyze the results and GeNorm (88) (implemented in qBASE+ 3.2) to select the most stable reference genes, which turned out to be *gyrA* and *rpoB*.

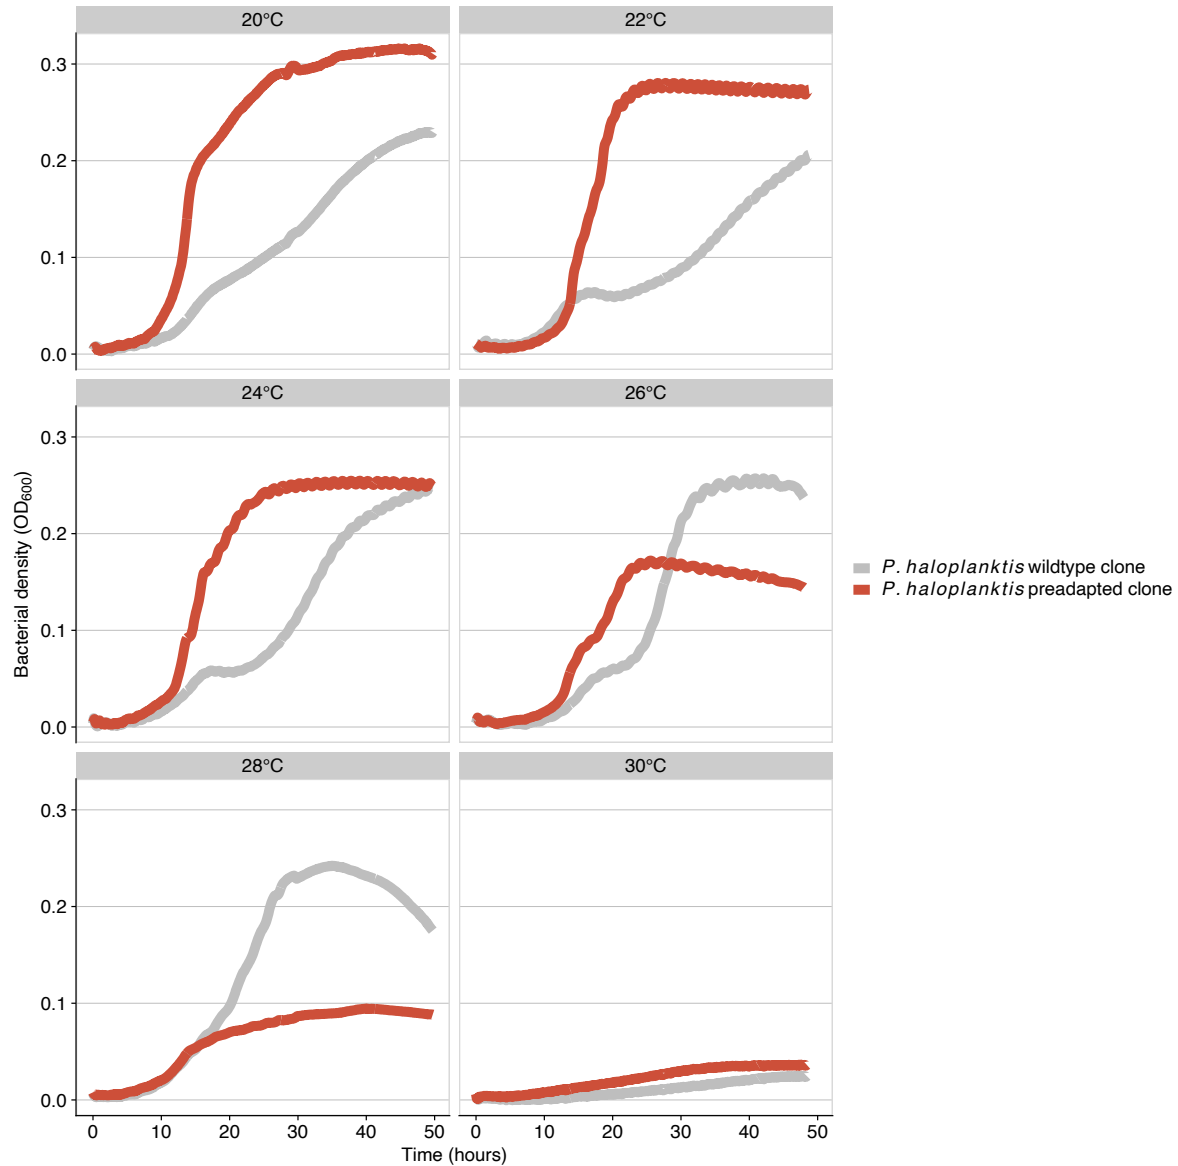

**Fig. S1.**

**The preadapted *P. haloplanktis* TAC125 clone grows better than wild-type *P. haloplanktis* in minimal medium.** We measured growth during 48 hours at temperatures ranging between 20°C and 30°C, using a wild-type clone and the preadapted clone. The preadapted clone had been adapted to minimal medium (minimal marine sea water supplemented with 0.1% D-gluconic acid) during 145 generations. Each growth curve is an average of 12 biological replicate populations started from one of the clones.

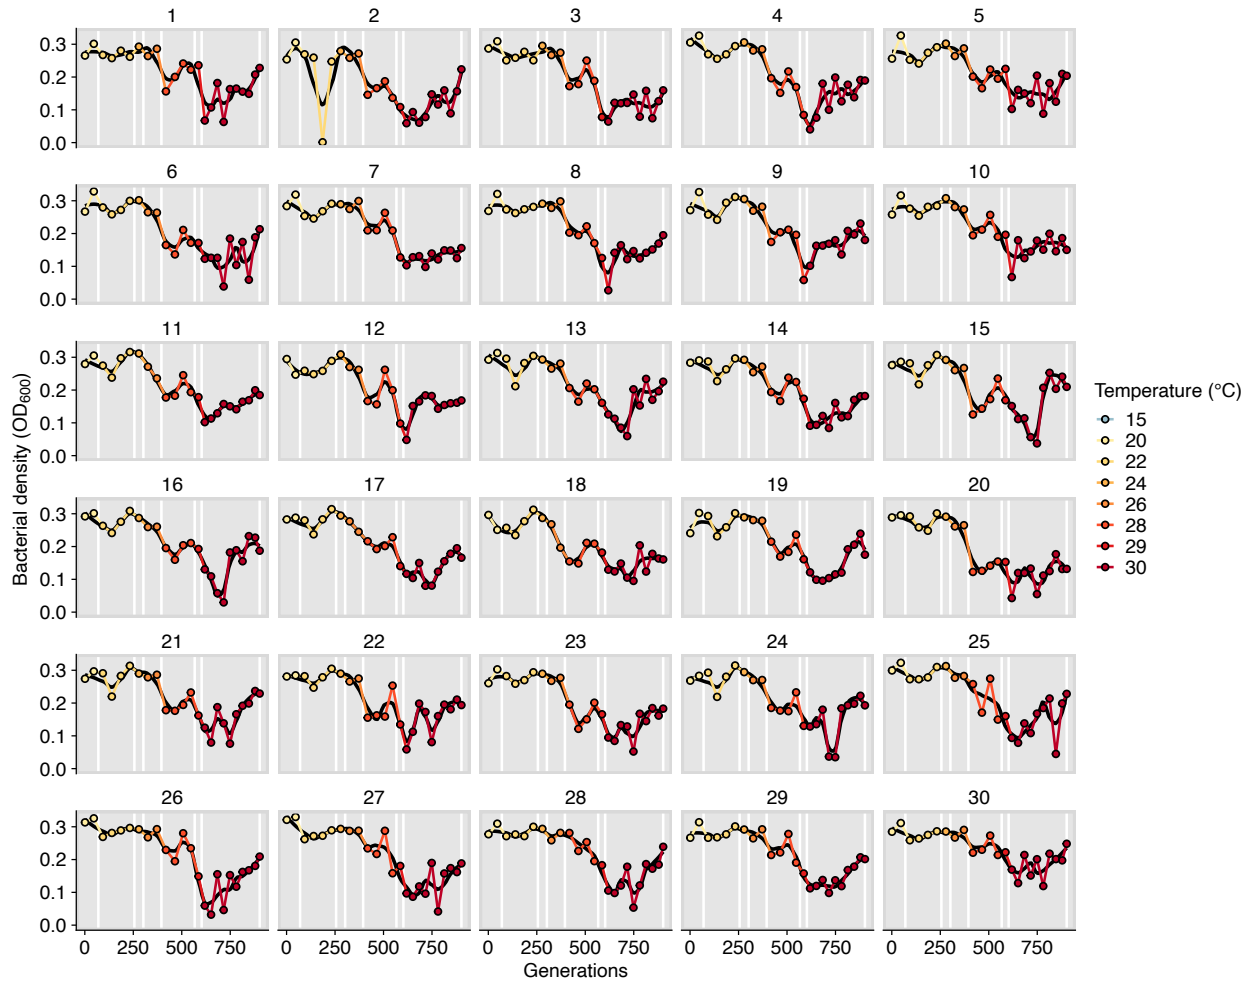

**Fig. S2.**

**Evolutionary rescue upon exposure to 30°C.** Bacterial density plotted against number of generations of experimental evolution for each of the 30 evolving populations. The color of the dots indicates the temperature at which the populations were evolving when we measured bacterial density (OD<sub>600</sub>). We measured bacterial density once per week just before daily transfer to a batch of fresh medium. Vertical white lines show the approximate generation at which the temperature was increased.



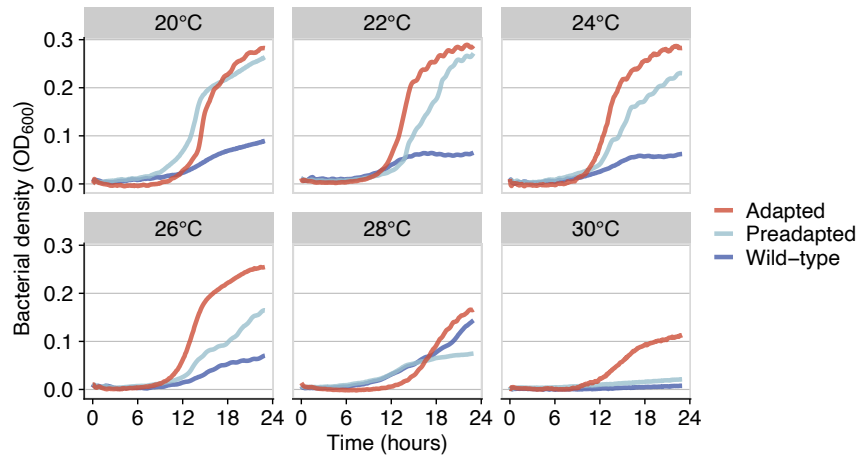

**Fig. S3.**

**Fitness gains increase with temperature.** Growth curves measured during 23 hours at different temperatures (see panel labels) using the initial preadapted clone (light blue line), wild-type clone (dark blue line) or populations adapted to each temperature (red line). The growth curve for the preadapted and wild-type clones is the average of 12 biological replicates, and the growth curve for the evolved populations is the average of 90 biological replicates (3 replicate population samples for each of 30 evolving populations).

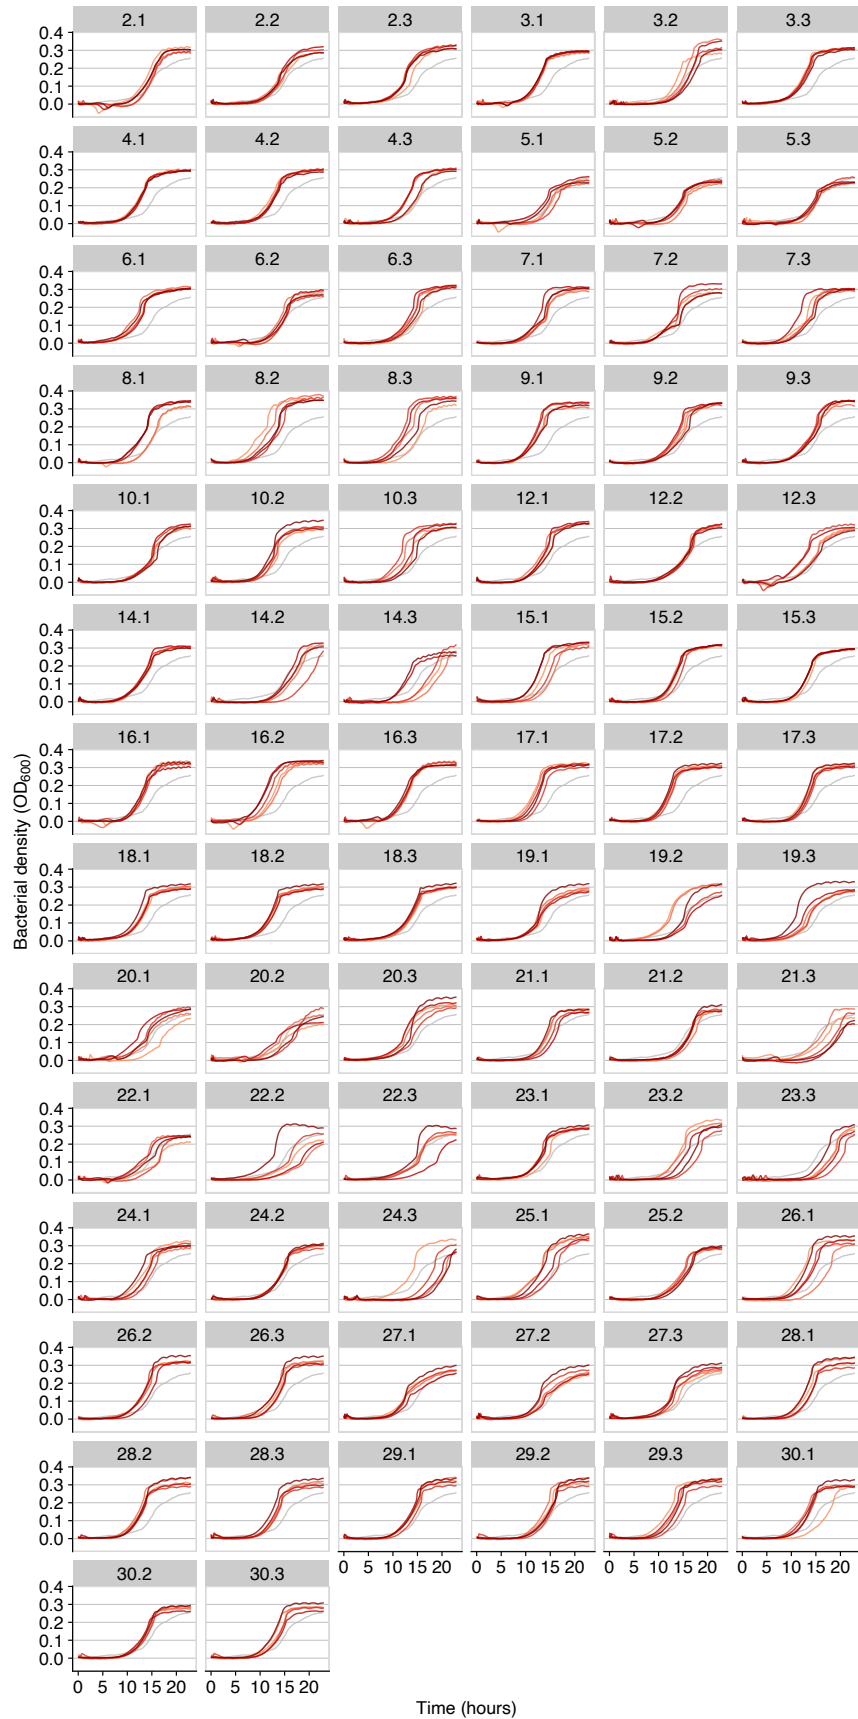

**Fig. S4.**

**Adaptation to 30°C does not involve fitness tradeoffs at 20°C.** We grew each of the clones adapted to 30°C at 20°C for 23 hours in minimal medium, and measured OD<sub>600</sub> every 10 minutes. The horizontal axis shows time in hours, and the vertical axis shows bacterial density (OD<sub>600</sub>). Red indicates growth curves for clones adapted to 30°C, grey indicated the growth curve of the preadapted clone. We measured growth in five biological replicates for each of the evolved clones (colored in different shades of red), and for the preadapted clone (grey line). For the preadapted clone we plot the growth rate averaged across the 5 replicates. Above each panel we indicated the clone number. For each population adapted to 30°C we isolated 3 clones, which we named ‘population\_number.1’, ‘population\_number.2’, ‘population\_number.3’ (e.g. clone 5.1 is the first clone isolated from population 5). The red curves do not fall below the grey curve for most of the clones, indicating that adaptation to 30°C does not involve, in general, fitness tradeoffs at 20°C.

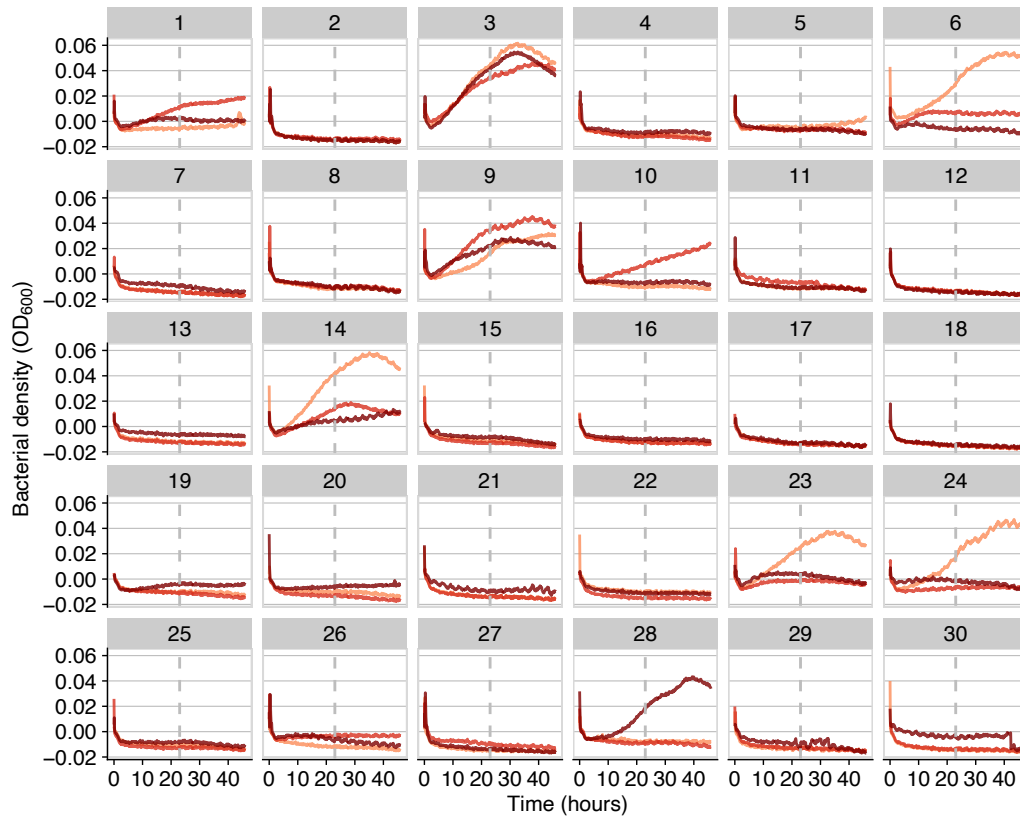

**Fig. S5.**

**Populations adapted to 30°C cannot grow at 32°C.** We grew populations adapted to 30°C at 32°C during 48 hours, and measured bacterial density (OD<sub>600</sub>) every 10 minutes using a plate reader. The x-axis indicates time and the y-axis bacterial density (OD<sub>600</sub>). Data are based on 3 biological replicates per population.

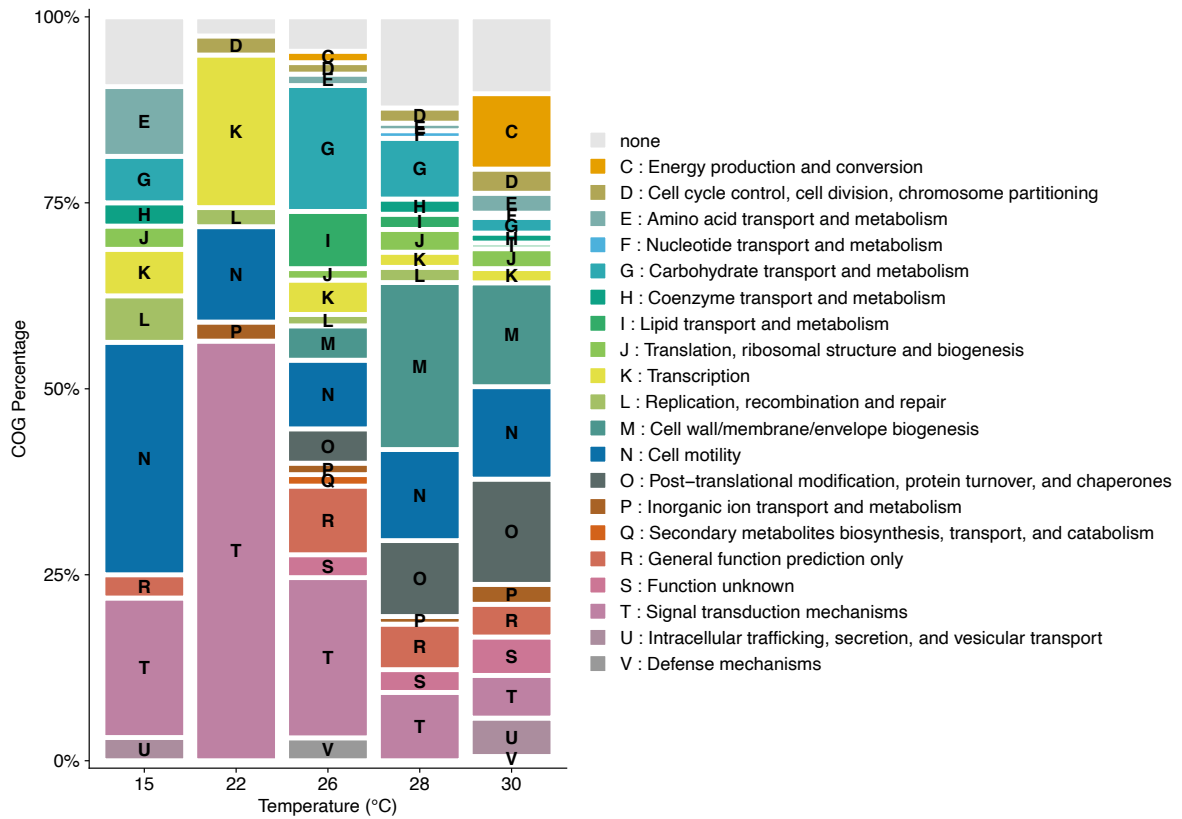

**Fig. S6.**

**The distribution of genetic variants across 20 functional gene categories for populations adapted to different temperatures (horizontal axis).** We plotted the percentage of genetic variants (point mutations, indels < 30 nt and deletions affecting only one gene) falling inside each COG (Clusters of Orthologous Groups) category at each temperature (horizontal axis). In grey we indicate the percentage of mutations in genes that do not have a COG category assigned.

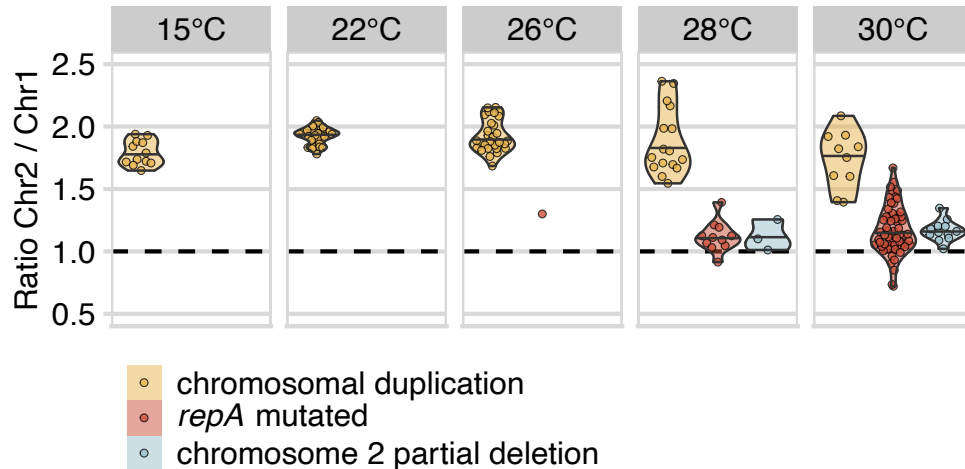

**Fig. S7.**

**Two mutational routes to reduce the number of copies of chromosome 2.** Number of copies of chromosome 2 for clones adapted to various temperatures. The number of copies of chromosome 2 is estimated by the ratio between the number of genome sequencing reads that overlap chromosome 2 and chromosome 1. Clones carrying the duplication of chromosome 2 are colored in yellow, clones carrying a mutation in the *repA* gene (a gene involved in replication located on chromosome 2), which reduces the number of copies of chromosome 2 from two to one, are colored in red, and clones with a partial deletion of one of the two copies of chromosome 2 are colored in blue.

The panel for 30°C includes clones isolated from the same populations. Below we detail the clones and populations represented in each category.

Chromosome 2 partial deletion: population 8 (clones 1, 2, 3), populations 26 (clones 1, 2, 3), population 28 (clones 1, 2, 3), population 29 (clones 1, 2, 3).

Chromosomal duplication: population 2 (clone 3), population 12 (clones 1, 2, 3), population 21 (clones 1, 2, 3), population 22 (clones 1, 2, 3).

*repA* mutated: population 2 (clones 1, 2), population 3 (clones 1, 2, 3), population 4 (clones 1, 2, 3), population 5 (clones 1, 2, 3), population 6 (clones 1, 2, 3), population 7 (clones 1, 2, 3), population 10 (clones 1, 2, 3), population 14 (clones 1, 2, 3), population 15 (clones 1, 2, 3), population 16 (clones 1, 2, 3), population 9 (clones 1, 2, 3), population 17 (clones 1, 2, 3), population 18 (clones 1, 2, 3), population 19 (clones 1, 2, 3), population 20 (clones 1, 2, 3), population 23 (clones 1, 2, 3), population 24 (clones 1, 2, 3), population 25 (clones 1, 2, 3), population 27 (clones 1, 2, 3), population 30 (clones 1, 2, 3).

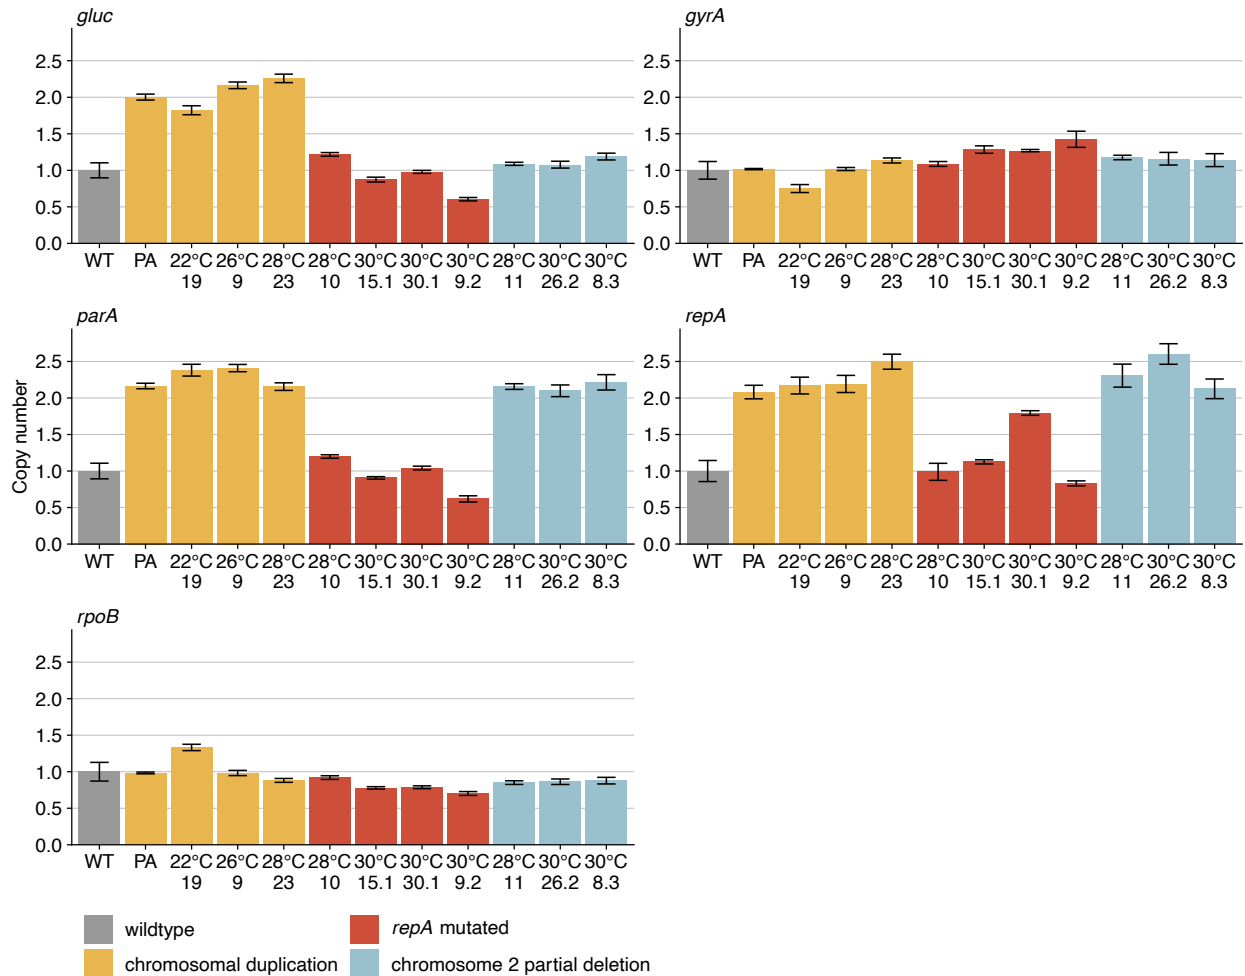

**Fig. S8.**

**Mutational routes to reduce the number of copies of chromosome 2 from two to one.** qPCR results confirm the existence of two routes to reduce the number of copies of chromosome 2 from two back to one: mutations in *repA* and the partial deletion of chromosome 2. Copy number for the *gyrA* gene, the *rpoB* gene, the gluconic acid transporter gene (*gluc*), the *parA* gene and for the *repA* gene for clones carrying one or two copies of chromosome 2. Housekeeping genes *gyrA* and *rpoB* show similar values in the wild-type isolate, and in clones with and without the chromosomal duplication adapted to different temperatures. The gluconic acid transporter gene (*gluc*), *parA* and *repA* are located on chromosome 2 but are expected to have different copy number depending on whether the mutation that reverts the chromosome 2 duplication is a mutation in *repA* or a partial deletion of chromosome 2. Clones carrying the duplication of chromosome 2 show higher copy number of the *repA*, *parA* and *gluc* genes compared to the wild-type and to clones compensating the chromosomal duplication through *repA* mutations. Clones compensating the duplication through partial chromosomal 2 deletion also show higher copy number of *repA* and *parA* than the wild-type clone, because both genes are located in the chromosome 2 region that is not partially deleted. The *gluc* gene is located in the chromosome 2 region that is partially deleted and hence, its copy number is the same in clones carrying *repA*

mutations, partial chromosome 2 deletion and the wild-type clone. The copy number of *gluc* is only increased in clones carrying the chromosome 2 duplication. Copy number values are relative to the wild-type *P. haloplanktis* clone. Copy number is quantified on the vertical axes as the CNRQ (Calibrated Normalized Relative Quantity). Error bars represent the standard error of the mean for three technical replicates per sample.

WT: wild-type strain, PA: Preadapted clone, 22°C 19: clone isolated from population 19 adapted to 22°C, 26°C 9: clone isolated from population 9 adapted to 26°C, 28°C 23: clone isolated from population 23 adapted to 28°C, 28°C 10: clone isolated from population 10 adapted to 28°C, 30°C 15.1: clone 1 isolated from population 15 adapted to 30°C, 30°C 30.1: clone 1 isolated from population 30 adapted to 30°C, 30°C 9.2: clone 2 isolated from population 9 adapted to 30°C, 28°C 11: clone isolated from population 11 adapted to 28°C, 30°C 26.2: clone 2 isolated from population 26 adapted to 30°C, 30°C 8.3: clone 3 isolated from population 8 adapted to 30°C.



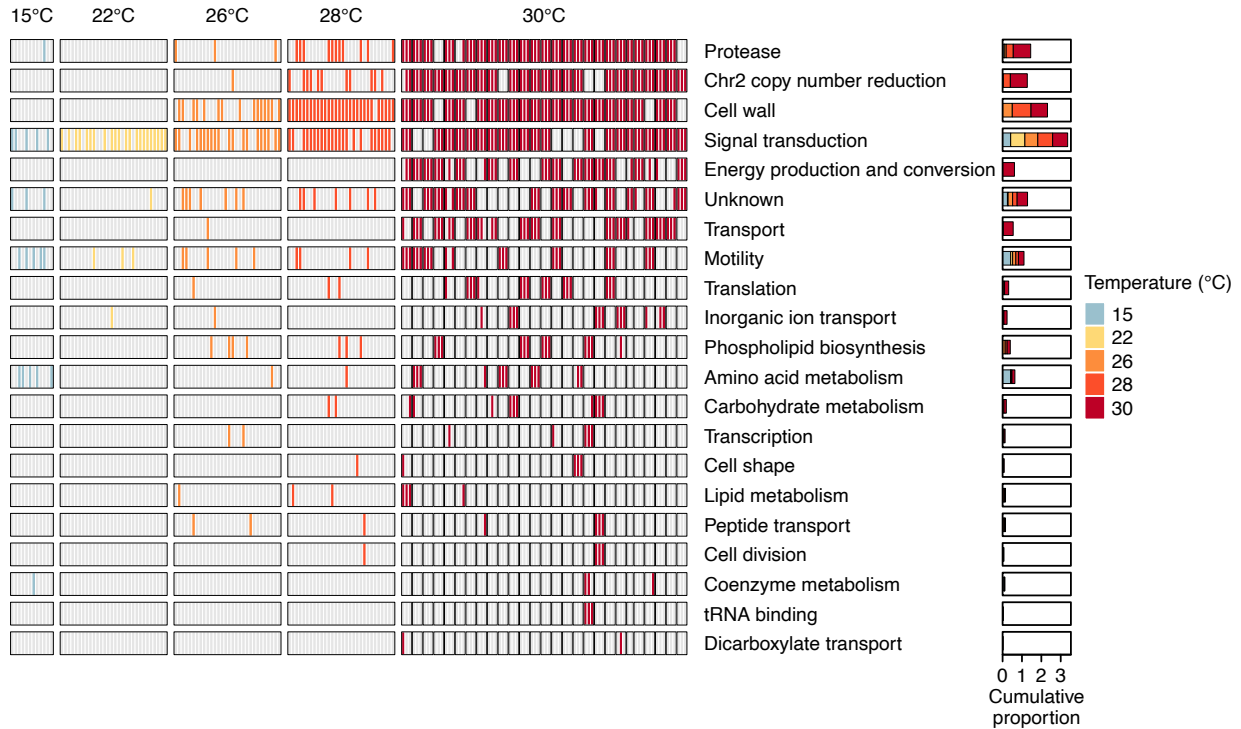

**Fig. S9.**

**As temperature increases variation accumulates preferentially in some classes of genes.** We clustered mutated genes into functional categories (Data S3), and we indicate for each sequenced clone at each temperature in which gene category mutations occur. The temperature is displayed on the top horizontal axis, and the functional gene categories on the right vertical axis. Small colored vertical bars denote each of the sequenced clones. Clones adapted to 30°C are grouped by population. Next to each functional category, a bar plot indicates the proportion of clones that harbor a mutation falling in that category at a given temperature. The functional category 'Protease' includes mutations in Lon protease and other proteases.

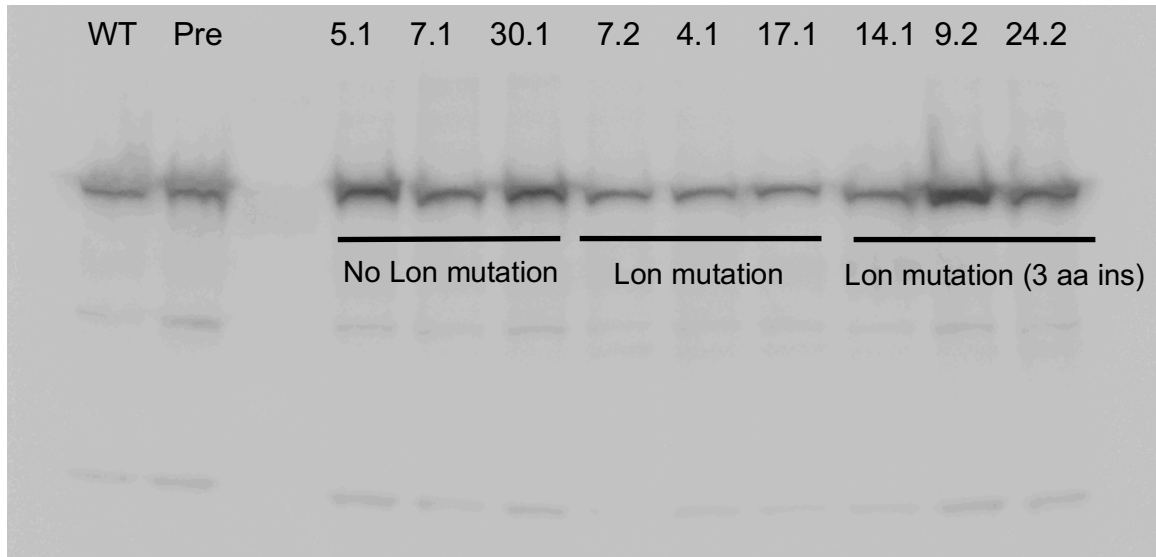

**Fig. S10.**

**Mutations in Lon protease do not affect Lon protease expression.** Western blot of wild-type Lon protease and Lon protease from clones adapted to 30°C carrying different mutations in Lon protease. WT: *P. haloplanktis* wild-type clone, Pre: *P. haloplanktis* preadapted clone. The remaining clones are isolated from populations adapted to 30°C. For each population adapted to 30°C we isolated 3 clones, which we named ‘population\_number.1’, ‘population\_number.2’, ‘population\_number.3’ (e.g. clone 5.1 was isolated from population 5). Lon mutation includes 3 types of mutations: His505Tyr (clone 7.2), Leu278\_Lys279del (clone 4.1) and Arg292Cys (clone 17.1). Lon mutation (3aa ins) refers to the mutation Met280\_Met281insMetSerPro, i.e., a Methionine-Serine-Proline insertion between Met280 and Met281. To prepare this western blot, we grew wild-type clones at 20°C and clones adapted to 30°C at 30°C. We used an antibody against *E. coli* Lon protease (Biorbyt). Because it is a polyclonal antibody, it is highly unlikely that the mutations in Lon protease affect the binding of the antibody. The Lon protease band is the upper-most band. All other bands are unspecific bands, which are typical of polyclonal antibodies.

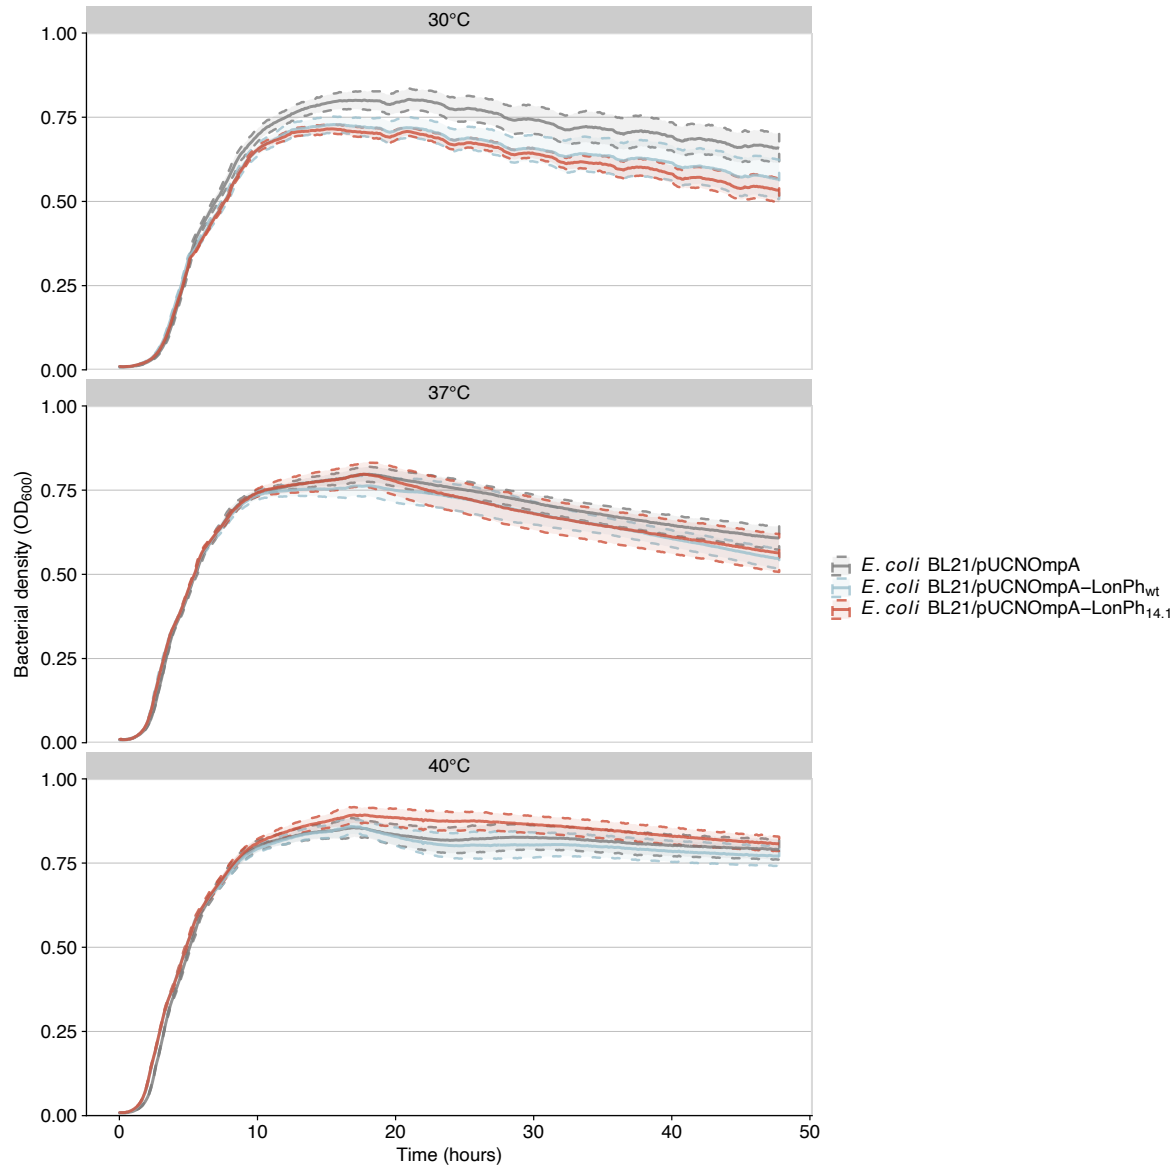

**Fig. S11.**

***E. coli* cells expressing mutated Lon protease from *P. haloplanktis* grow better at higher temperatures.** 48 hour growth curves measured at 30°C, 37°C and 40°C for *E. coli* BL21 cells carrying an empty plasmid (grey, *E. coli* BL21/pUCNOmpA), a plasmid expressing the wild-type Lon protease from *P. haloplanktis* (blue, *E. coli* BL21/ pUCNOmpA-LonPh<sub>wt</sub>), or a plasmid expressing the mutated (Met-Ser-Pro insertion) Lon protease from *P. haloplanktis* (red, *E. coli* BL21/ pUCNOmpA-LonPh<sub>14.1</sub>). Shaded areas indicate 95% confidence interval of the mean. We measured each growth curve in 12 replicate populations derived from the same Lon protease-expressing clone.

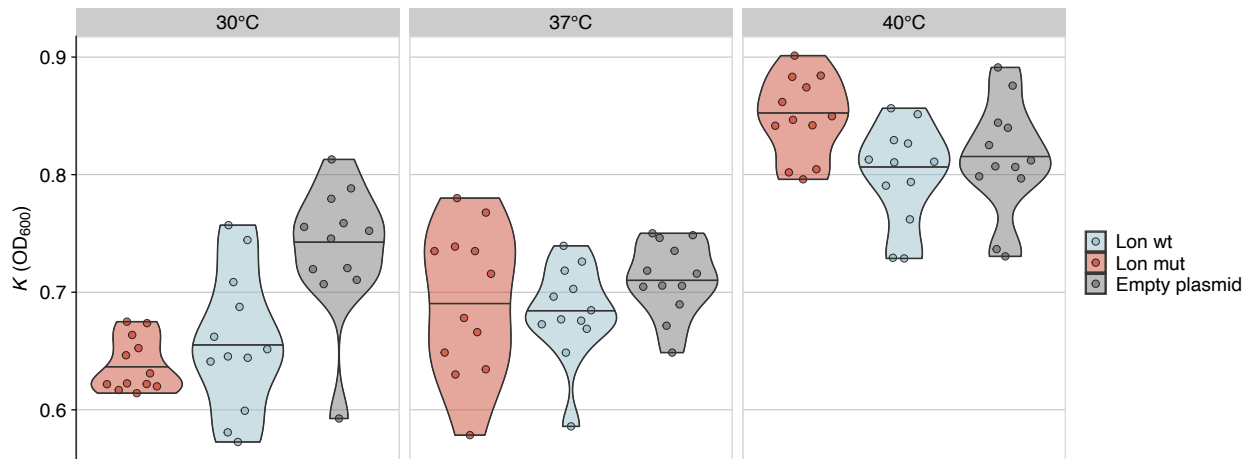

**Fig. S12.**

**Mutations in Lon protease are key for adaptation to high temperature.** Maximum population density ( $K$ ) in *E. coli* BL21 strain carrying an empty plasmid (grey), a plasmid expressing the wild-type Lon protease from *P. haloplanktis* (blue) or a plasmid expressing the mutated (Met-Ser-Pro insertion) Lon protease from *P. haloplanktis* (red). We measured growth curves at 30°C, 37°C and 40°C. We performed 12 biological replicates for each *E. coli* and plasmid combination, and for each temperature.

**30 °C**

pUC (empty)   pUC (Lon WT)   pUC (Lon mut)   pUC (Lon *E. coli*)  
Time (h) 0   5   0   2   5   0   2   5   0   2   5

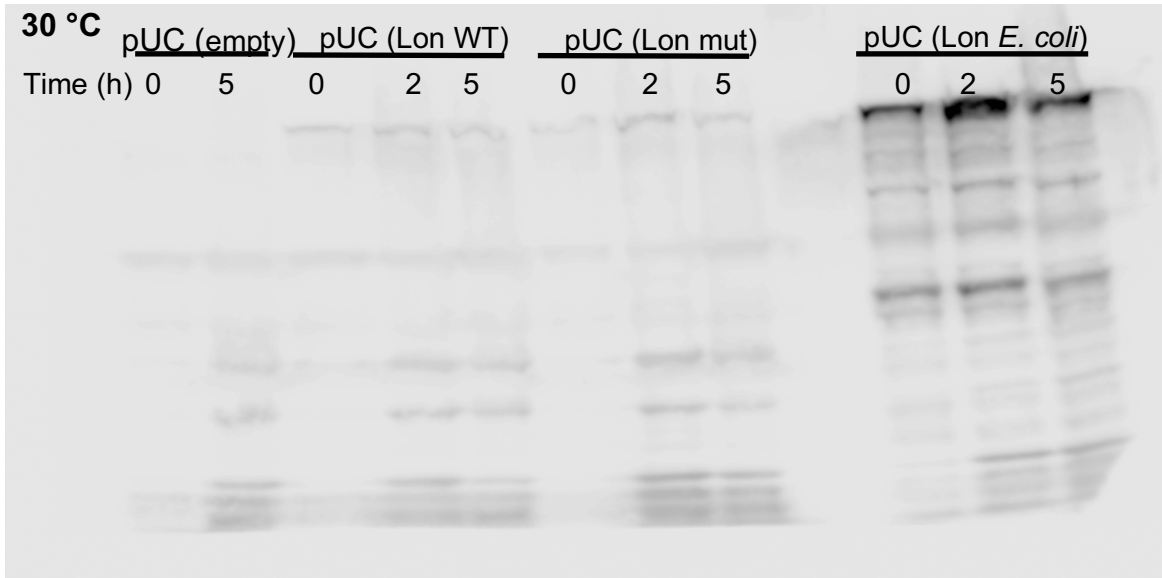

**37 °C**

pUC (empty)   pUC (Lon WT)   pUC (Lon mut)   pUC (Lon *E. coli*)  
Time (h) 0   5   0   2   5   0   2   5   0   2   5

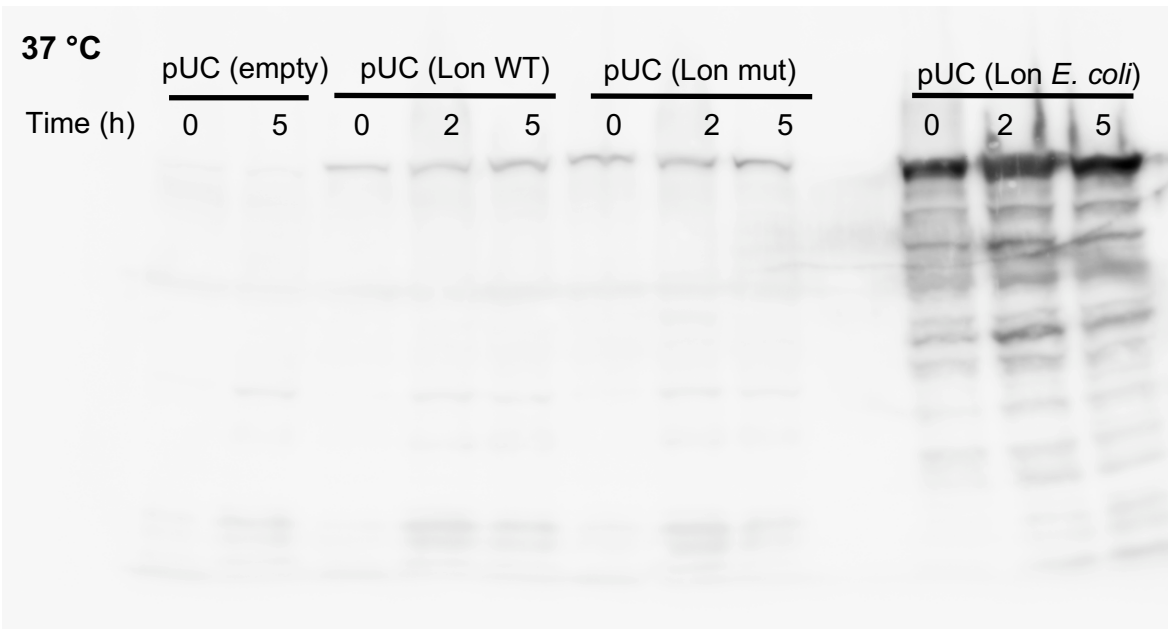

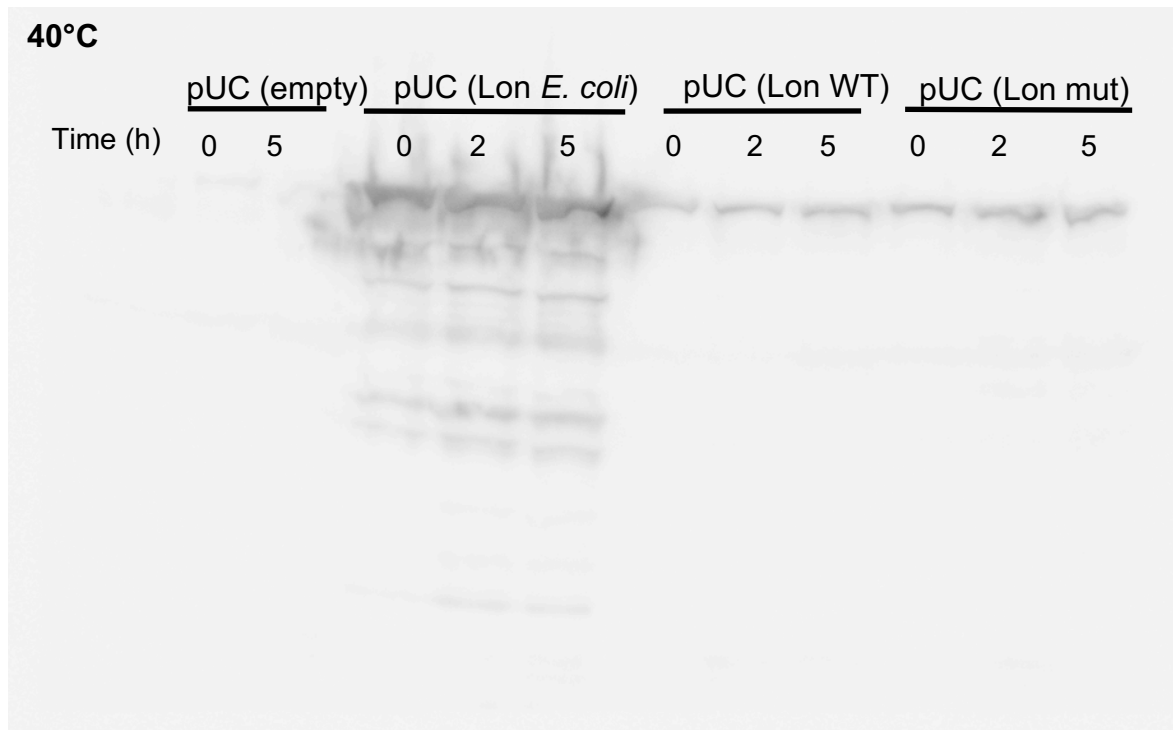

**Fig. S13.**

**Western blot for wild-type Lon protease and mutated Lon protease (3aa insertion) expressed in *E. coli* BL21 cells at 30°C, 37°C and 40°C.** We performed western blots to confirm the expression of Lon protease during the growth curves measured to investigate the effect of Lon protease on the growth of *E. coli* at different temperatures. We used an antibody against *E. coli* Lon protease (Biorbyt). Because it is a polyclonal antibody, it is highly unlikely that the mutations in Lon protease affect the binding of the antibody. The Lon protease band is the upper-most band. All other bands are unspecific bands, which are typical of polyclonal antibodies.

> pUCNompA-EYFP-1

CTTTCGTTTTATCTGTGTTTGTGCGGTGAACGCTCTCCTGAGTAGGACAAATCCGCCGCC  
CTAGACCTAGGGTACGGGTTTTGCTGCCCGCAAACGGGCTGTTCTGGTGTGCTAGTTTG  
TTATCAGAATCGCAGATCCGGCTTCAGGTTTGCCGGCTGAAAGCGCTATTTCTTCCAGAA  
TTGCCCCCGTAGAAAAGATCAAAGGATCTTCTTGAGATCCTTTTTTTCTGCGCGTAATCT  
**GCTGCTTGCAAACAAAAAACACCCTACCAGCGGTGGTTTGTGTCGGGATCAAGAGC  
TACCAACTCTTTTTCCGAAGGTAACGGCTTCAGCAGAGCGCAGATACCAAATACTGTCC  
TTCTAGTGTAGCCGTAGTTAGGCCACCACTTCAAGAACTCTGTAGCACCGCCTACATACC  
TCGCTCTGCTAATCCTGTTACCAGTGGCTGCTGCCAGTGGCGATAAGTCGTGTCTTACCG  
GGTTGGACTCAAGACGATAGTTACCGGATAAGGCGCAGCGGTCCGGCTGAACGGGGGGTT  
CGTGCACACAGCCAGCTTGGAGCGAACGACCTACACCGAACTGAGATACCTACAGCGTG  
AGCTATGAGAAAGCGCCACGCTTCCCGAAGGGAGAAAGGGGACAGGTATCCGGTAAGCG  
GCAGGTCGGAACAGGAGAGCGCACGAGGGAGCTTCAGGGGGAAACGCCTGGTATCTTT  
ATAGTCTGTGGGTTTCGCCACCTCTGACTTGAGCGTCGATTTTTGTGATGCTCGTCAG  
GGGGCGGAGCCTATGAAAAACGCCAGCAACCGGGCTTTTTACGGTTCCTGGCCTTTT  
GCTGGCCTTTTGTCTACATCCTAGTGCTTGGATTCTCACCAATAAAAAACGCCCGCGGC  
AACCGAGCGTTCTGAACAAATCCAGATGGAGTTCTGAGGTCATTACTGGATCTATCAACA  
GGAGTCCAAGCGAGCTCTCGAACCCAGAGTCCCGCTCAGAAGAACTCGTCAAGAAGCGG  
ATAGAAGGCGATGCGTGCGAATCGGAGCGGCGATACCGTAAAGCACGAGGAAGCGGTC  
AGCCCATTCGCCGCAAGCTCTTCAGCAATATCACGGGTAGCCAACGCTATGTCTTGATA  
GCGGTCCGCCACACCCAGCCGGCCACAGTCGATGAATCCAGAAAAGCGGCCATTTTCCAC  
CATGATATTCGGCAAGCAGGCATCGCCATGGGTACGACGAGATCCTCGCCGTCGGGCAT  
GCGCGCCTTGAGCCTGGCGAACAGTTCCGGCTGGCGCGAGCCCCGATGCTCTTCGTCCAG  
ATCATCTGATCGACAAGACCGGCTTCCATCCGAGTACGTGCTCGCTCGATGCGATGTTT  
CGCTTGGTGGTCGAATGGGCAGGTAGCCGGATCAAGCGTATGCAGCCGCCGATTCATC  
AGCCATGATGGATACTTCTCGGCAGGAGCAAGGTGAGATGACAGGAGATCCTGCCCGG  
CACTTCGCCCAATAGCAGCCAGTCCCTTCCCGCTCAGTGACAACGTCGAGCACAGCTGC  
GCAAGGAACGCCCGCTCGTGGCCAGCCACGATAGCCCGCTGCCCTCGTCTGCAGTTCATT  
CAGGGCACCGGACAGGTGCGTCTTGACAAAAGAACCAGGGCGCCCTGCGCTGACAGCCG  
GAACACGGCGGCATCAGAGCAGCCGATTGTCTGTTGTGCCAGTCATAGCCGAATAGCCT  
CTCCACCAAGCGGCCGAGAACTTCCGCTGCAATCCATCTTGTTCATCATGCGAAACGA  
TCCTCATCTGTCTCTTGATCAGATCTTGATCCCCCTGCGCCATCAGATCCTTGGCGCAA  
GAAAGCCATCCAGTTACTTTGCAGGGCTTCCCAACCTTACCAGAGGGCGCCCCAGCTGG  
CAATTCCGACGCTTAAGAAACCATTTATATCATGACATTAACCTATAAAAAATAGGCGTAT  
CACGAGGCCCTTTCGTTTACGGATCCCGGTAAGCGCATCCTCTCACGCCACGAGACAA  
CTTTCGGGGCTAAAAATTCACCTCTAATTTGTATCATTAAGTAAATTTAGGATTAATCTG  
GAACTTTTTTTTGTGCGCCAGCCAATGCTTTCAGTCTGACTAATTTTCTTGGCGAGGCT  
TGTCGAAGCGGTTTCCCGGATTCCTTCTGTAAATTTGTCGCTGACAAAAAAGATTAAC  
ATACCTTATACAAGACTTTTTTTTCATATGCCTGACGGAGTTCACACTTGTAAGTTTTCA  
ACTACGTTGTAGACTTTACATCGCCAGGGGTGCTCGGCATAAGCCGAAGATATCGGTAGA  
GTTAATATTGAGCAGATCCCCCGGTGAAGGATTTAACCGTGTATCTCGTTGGAGATATT  
CATGGCGTATTTTGGATGATAACGAGGCGCAAAAAATGAAAAAGACAGCTATCGCGATTG  
CAGTGGCACTGGCTGCTCTCGCTACCGTAGCGCAGGCCGCTCCGAAAGATATCTCGATTT  
AAGAAGGAGATATACATCTCGAGATGGTGAGCAAGGGCGAGGAGCTGTTACCGGGGTGG  
TGCCCATCTGCTGGTCGAGCTGACGGCAGCTAAACCGGCCAACGTTACGCGTGTCCGGCG  
AGGGCGAGGGCGATGCCACCTACGGCAAGCTGACCCGAAAGTTTCATCTGCACCACCGGCA  
AGCTGCCCGTGCCCGGCCACCTCGTGACCACCTTCGGCTACGGCCTGCAATGCTTCG  
CCCGTACCCCGACCACATGAAGCTGCACGACTTCTTCAAGTCCGCCATGCCCGAAGGCT  
ACGTCCAGGAGCGCACCATCTTCTTCAAGGACGACGGCAACTACAAGACCCGCGCCGAGG  
TGAAGTTCGAGGGCGACACCCTGGTGAACCGCATCGAGCTGAAGGGCATCGACTTCAAGG  
AGGACGGCAACATCTGGGGCACAAGCTGGAGTACAACACTACAACAGCCACAACGTTATA  
TCATGGCCGACAAGCAGAAGAACGGCATCAAGGTGAACCTTCAAGATCCGCCACAACATCG  
AGGACGGCAGCGTGCAGCTCGCCGACCACTACCAGCAGAACACCCCATCGGCGACGGCC  
CCGTGCTGCTGCCCGACAACCACTACCTGAGCTACCAGTCCGCCCTGAGCAAAGACCCCA  
ACGAGAAGCGCGATCAGATGGTCTGCTGGAGTTCGTGACCGCCCGGGGATCACTCTCG  
GCATGGACGAGCTGTACAAGTGAATCTAGAGGCATCAAATAAACGAAAGGCTCAGTCGAA  
AGACTGGGC**

**Fig. S14.**

DNA sequence of the plasmid pUCNompA-EYFP-1. Bold indicates the pUC origin of replication, orange shows the ompA promoter and yellow indicates the EYFP gene.

P\_hal MT-----  
E\_coli MN-----  
P\_aer MKTL-----  
B\_subt -----  
P\_aqua MSEHKIAPDNIDIDVDVSTTVAEDNEPNTSSDNTLDAVSADVNETDSEIDSDDSTAKDDA  
T\_ther -----  
T\_mar MSKK-----SKDTEKSFKILEKYASQQE  
M\_prof MYP-----  
M\_psy MYP-----  
M\_therm MH-----

P\_hal -LERTDRVEIPVLALRD-VVVYPHMPVIPLFVGREKSIKCLEAAMD--KDKQIFLVAQKDA  
E\_coli -PERSERIEIPVLPLRD-VVVYPHMPVIPLFVGREKSIRCLEAAMD--HDKKIMLVAQKEA  
P\_aer -----VELPLLPLRD-VVVYPHMPVIPLFVGREKSIEALEAAMT--GDKQILLLAQKNP  
B\_subt -MAEELKRSIPLLPARG-LLVYPTMVLHLDVGRDKSVQALEQAMM--HDHMIPLATQQDI  
P\_aqua TEDNTVEDYPLLLALRD-VVVYPHMQIALFVGRAPSVKAVELAQAQAE-YGNKVLVLAQKDS  
T\_ther -MKDFLRLELPVLPLRN-TVVLPHTTTGVDVGRLLKSKRAVEEALS--ADRLFLVLTQKDP  
T\_mar -KELEIPDSLPCIPLRNGMGVFPNTVVPFVYVGRGTGSLIALEEAMEK-YNRLLLNVNQKDP  
M\_prof -QATENGTESIVIRLSE-IVIYPESKTKFLADKKTQGVLLSMMEEEGTAYAVGLTMKDG  
M\_psy -QQLNNNESIVIPLFE-VVVYPNSQTKFLADKTIGETLLNDIRNEGYARAIGLTVKSGT  
M\_therm -SPHADSNETIVIPLFE-TVVYPETRTKFLQVDTALGELLIAAMKSDGSASAVGLTVKGGT  
: \* : \* . . . : : :

P\_hal TVDEPEQDDIYRVGTIATVLQLLK--LPDSTVKVLVEGTQRAKIEEFIDSEEFFVANAQF  
E\_coli STDEPGVNDLFTVGTVASILQMLK--LPDSTVKVLVEGLQRARISALSNDGEHFSAKAEY  
P\_aer ADDDPGEDGLYRMGTVATVLQLLK--LPDSTVKVLVEGEQRGQVERFIEEEGHIRAAVQA  
B\_subt SIDEPGEDEIFTVGTGYTKIKQMLK--LPNSTIRVLVEGLKRAQIVKYNEHEEYTSVDIQL  
P\_aqua LTEDIDQDNLYQYGTVCRIVSTMPHSDENCIKVLEGGYRARVDNIENHDELLMASFER  
T\_ther EVDDPAPEDLYAVGTLAVVKQAMR--LPDSTLQVMVEARSRARLLSYVAAP-YLRAVGEA  
T\_mar SVEIPEPEDLYKVGTVVKVLQIMK--LPDSTFKVLVEGLERAQIEEFVSTDPFFLTKIKI  
M\_prof QLSDLSEETLYKTGNLLEIISILP--ADEYV-VFARSVKRVRSTSIYKKGDMFYTTYEH  
M\_psy KSSDLSEDDLYRTGNLLEIKFVQP--ADEYFL-VYAQALERVGSVSLNQKNGLFYATSTA  
M\_therm PPAEIPAEGLYTTGNLLMTHAQP--ADDEYL-VFARAVRRVKAVAVSERDQGFYAAFEF  
: : : \* . : : . . \* . . \*

P\_hal IE-SESIDEHEQDVFIRSAISQFEGYVKLNKKIPPEVLT--SVSGIDDPARLADTMAAHM  
E\_coli LE-SPTIDEREQEVLVRTAISQFEGYIKLNKKIPPEVLT--SLNSIDDPARLADTIAAHM  
P\_aer ID-DANVGEREAEVFTSRLSLSQFQYVQLGKKVPAEVL--SLNSIDEPSRLVDTMAAHM  
B\_subt IH-EDDSKDEDEALMRTLDDHFDQYIKISKISAETYA--AVTDIEEPGRMADIVASHL  
P\_aqua ADLDISMDESQQKNTIQALTSLFESYADARLRNARELTR--VAKRIDDLLELVYFISTRV  
T\_ther IPEPPLKDPPEARVLVNEVQEAFAERYLQNHKTLRLDRYQQEAVKSTRDPAIADLVAHHA  
T\_mar LK-VKYRKTCKLEALMRSVKDKAVRYFNLTHRFQETLV--TLKEMQDPDKLADVASIL  
M\_prof VQDVDDLDEGLREVILKDIKKMIYE-ISERFKSSETFTK--PIDKMDSVDQIMGYVMPFM  
M\_psy VPDIDDLDEDLHKQIMGDVTRKTIHE-ISSRFQSSEQFTR--PIDKMDSIDQIMGYVMPFM  
M\_therm LPDIMDIDEETREKMLAEIKAAVHD-ISANFQSGSEQFTR--PVDRMGSDQIMAFVMPFM  
. : :

P\_hal PLKVPEKQKVLLETSSVTERLEYLMALMEGEIDLLQVEKKIRSRVKKQMEKSCREYYLNEQ  
E\_coli PLKLADKQSVLEMSDVNERLEYLMAMMESEIDLLQVEKRIRNRVKKQMEKSCREYYLNEQ  
P\_aer ALKIEQKQDILEITDLSRVEHVLALLDAEIDLLQVEKRIRGRVKKQMEKSCREYYLNEQ  
B\_subt PLKLLKDKQDILETADVDRLNKVIDFINNEKEVLEIEKKIGQRVVRSMERTKREYYLREQ  
P\_aqua SMDLEVKQSFLEKNDIKTHINTLLEYLVKQSAEQNIEQDIQEAVRQOMEDNREYFLNEK  
T\_ther TWTLEEKQTILETPEVEERLKRVLALLRDLERFELDKKIAARVKEQMDQNREYYLREQ  
T\_mar PVPLETKQELLETVHPLERLEKILSILVKEIEIEIEEIEKKVKDRIEKTREYVLRK  
M\_prof PIEVKDKQDLETVSVRERYLTFLYVLTNQKENINIQIEVAKKVAEKVNRTHREAMLREQ  
M\_psy PIELQEKQDLETVSTRERYLTFLYILTNQKENINIQIEVARKVAEKVNRKSHREAMLREQ  
M\_therm PVEVAAKQSLETVSVRERYTAFRLRLVLDLSEINLRIEVARKASEKIGKANREAMLREQ  
. : \*\* .\*\* : . : : : . : : \*\* \*.\* :

P\_hal MKAIQKELGELDDV----PDEFEALKKRIEESGMPTEAKEKATAELSKLMMSPMSAEAS  
E\_coli MKAIQKELGEMDDA----PDENEALKRKIDAAMPKEAKEKAEAELOKLMMSAEAT



P\_aer MKAIQKELGDIDEG----HNEVEELKKRIDAAGLTKEAHTKATAELNK...  
B\_subt MKAIQKELGDKEGK----TGEVQTLTEKIEEAGMPEHVKETALKELNRYEKI...  
P\_aqua MKAIKNELSDMNDGAFDGEDDVAELEQRLEDADLPEDVRKKAQEMKK...  
T\_ther MKAIQKELGGGEDF----LTEIEELRERIEKKGMPPEVKEKALKELKR...  
T\_mar LRAIKEELGVEEEL-----EIKELYEKVEKGDYDPDYVKEKAYKEIQ...  
M\_prof LKVIQEELHEFD...ESGEANYKDRIERSGMPEDVKKKAFSELK...  
M\_psy LKVIQEELNESEDP----VSGEGGYRERIESSKMPDEVKKKALSELK...  
M\_therm LRVIQEELNG--GDG----SSGEEGYRERIERSTMPPEVRKKALAE...  
:::\*\*\* : : . . : \* \* : : : \*

P\_hal VVRSYIDTLISVPWKKRSKVKKDLAGAOKILDSHYGLEKVKERILEYLAVQ...  
E\_coli VVRSYIDWMVQVWPNARSKVKKDLRQAQIILDTDHYGLERVKDRILEYLAV...  
P\_aer VVRSYIDWLLNVPWKAESKVRHDLAKAEDILDADHYGLEEVKERILEYLAV...  
B\_subt VVRSYIDWLIALPWTDETDKDLKEAGRLLEDDEHHGLEKVKERILEYLAV...  
P\_aqua VVRSYIEWILDTPWNA...VSINLDKAKTVLDEDHYGLQDVKDRILEYLAV...  
T\_ther VVRSYIDWLLLEVPWTEAD...DISVTKRVLDEDHYGLEKVKERILEYLAV...  
T\_mar VVRSYIDWLLNLPWNVATE...RDLDIKEARKILDKNHYGLGEVKERILEY...  
M\_prof VVRSYIDL...LDPWDVTERKSIDIEQARNVLESNNHNGLEKVKERII...  
M\_psy VVRSYIDL...LDPWAVEEKKSIDIDQARSVLEGNHNGLEKVKERII...  
M\_therm VVRSYIDL...LDPWTV--EKSIDIEEARRVLESNHYGLEKVKERII...  
\* \* : : \* \* : : \* : \* \* \* : \* : \* : \* : \* : \* : \* : \*

P\_hal ---GPILCLVGP...GKTSLGQSIARSTGRKYIRMALGGVRDEAEIRGHRRTY...  
E\_coli ---GPILCLVGP...GKTSLGQSIARSTGRKYIRMALGGVRDEAEIRGHRRTY...  
P\_aer ---GPVLCVGP...GKTSLAESIARATNRKFVRMALGGVRDEAEIRGHRRTY...  
B\_subt ---GPILCLAG...GKTSLAKSIAKSLGRKFVRISLGGVRDESEIRGHRRTY...  
P\_aqua ---GPILCLVGP...GKTSLGESIARATGRKFVRMALGGVRDEAEIRGHRRTY...  
T\_ther KGHAPILCFV...GKTSLGKSIARSMNRRFHRI SLGGVRDEAEIRGHRRTY...  
T\_mar ---APILCLVGP...GKTSLGR...IAEAMGRKFGRMSLGGVRDEAEIKGHRRTY...  
M\_prof ---GSIILFTG...GKTSLGKSIADALGREYVRVSLGGVRDEAEIRGHRRTY...  
M\_psy ---GSIILFTG...GKTSLGKSIADALGREYVRASLGGVRDEAEIRGHRRTY...  
M\_therm ---GSILLVGP...GKTSLGR...IADALGRKYVRISLGGVKDEAEIRGHRRTY...  
: : \* : \* : \* : \* : \* : \* : \* : \* : \* : \* : \* : \* : \* : \*

P\_hal MIQNMTKVGVKNPLFLLDEIDKMSDDMRGDPASALLEVLDP...  
E\_coli LIQKMAKVG...VKNPLFLLDEIDKMSDDMRGDPASALLEVLDP...  
P\_aer LIQKMTKV...VGNPLFLLDEIDKMSDDMRGDPASALLEVLDP...  
B\_subt IIQGMK...KAGLNPVFLLEIDKMSDDFRGDPSSAMLEVLDP...  
P\_aqua IVQSLAK...VEVKNPLFLLDEIDKMAQDFR...GDPASALLEVLDP...  
T\_ther IIQGMK...QVGVNPFLLDEIDKLSDDWRGDPAAALLEVLDP...  
T\_mar IIQIIR...RLGTKNPVILLDEVDKMGISFQ...GDPASALLEVLDP...  
M\_prof IVQGI...RKAGTKNPVILDEIDKLSSSHSGDPASALLEVLDP...  
M\_psy IIQGI...RKAGTKNPVILDEIDKLSSSYS...GDPASALLEVLDP...  
M\_therm IIQGMK...RAGTLNPVFLLEVDKLA...VSYSGDPASALLEVLDP...  
: \* : : \* : \* : \* : \* : \* : \* : \* : \* : \* : \* : \* : \* : \*

P\_hal VMFVATSNSF--NIPG...LLDRMEVIRLSGYTEDEKLNIAK...  
E\_coli VMFVATSNSM--NIPAP...LLDRMEVIRLSGYTEDEKLNIAK...  
P\_aer VMFLCTANS...M--NIPAP...LLDRMEVIRLPGYTEDEKVNIAAK...  
B\_subt VLF...FIATANNL...ATIPG...PLDRMEIINIAGYTEIEKLEIVK...  
P\_aqua VMFICTANS...M--DIPP...ALLDRMEVIRLPGYTEEEKVNIAQ...  
T\_ther VFFIT...TANTLSTIPR...LLDRMEVIEIPGYTLHEKRAIARY...  
T\_mar VLFIT...TANVLHTIPP...ALDRMEIIEIPGYSDPEKYHIARD...  
M\_prof VLF...FIATANSLANIPG...PLDRMEIIEISGYTKNEKLDIAK...  
M\_psy VLF...FIATANSLASIPG...LLDRMEIIEISGYTKNEKLA...  
M\_therm VFF...FIATANSLSTIPAP...LLDRMEVIEISGYTKKEKFAIAK...  
\* : \* : \* : \* : \* : \* : \* : \* : \* : \* : \* : \* : \* : \* : \*

P\_hal DSAITGIIRY...YTREAGVRNLEREISKLCRKAVKNIL...  
E\_coli DSAIIGIIRY...YTREAGVRLEREISKLCRKAVKQLL...  
P\_aer EGALRDIIRY...YTREAGVRSLERQIAKVCRAKAVEHA...  
B\_subt DQAILDIIRY...YTREAGVRSLERQVLAICRKA...  
P\_aqua EAALHSIVRSY...TREAGVRNLEREISKLCRKAVK...  
T\_ther DRAIERIVQ...EYTREAGVRNLDRELSKVARKAAK...  
T\_mar PGAIKKIIR...EYTKREAGVRNLERVIEK...  
: : \* : \* : \* : \* : \* : \* : \* : \* : \* : \* : \* : \* : \*

```

M_prof      DDALKLMIERYTREAGVRGLKKQLARAARFVSEKIV-----SGNAELPYVIKADML
M_psy       DDALKVIIDKYTREAGVRGLKKQLATTARFISERIV-----SGKAGFPYMKADML
M_therm     DGAIAAIIIDRYTREAGVRTLKKELARIARYVSAKVV-----SGGVDPVVVVTADML
           *:  ::  **:***** *: :  *                               :  .  :

P_hal       EDFLGVQRFDYGAEDGDRIGQVTGLAWTEVGGDLLTIECAA VPGKGKLSYTGSLGDVMO
E_coli      HDYLG VQRFDYGRADNENRVGQVTGLAWTEVGGDLLTIE TACVPGKGKLYTGTSLGEVMO
P_aer       ENYLGVKRFYGLAEQQDQIGQVTGLAWTQVGGELLTIEAAVVPKGQLTKTGSLGDVMA
B_subt     QDFIGKRIFRYGQAETEDQGVVVTGLAYTTVGGDTLSIEVSLSPGKGLIITGKLGDVMR
P_aqua     DDYLG VHQDYGLAE EAPEIGRITGLAWTQVGGELLTIEAVAMKKGELSFTGSLGDV MK
T_ther     EAYLGVPKYRPDRAEKEPQVGA A QGLAWTPYGGTLLTIEAVAVPGTKVNL TGNLGEV MK
T_mar      EELLGPPVFR EEEI LEEDTVGAVTGLAWTPVGGSVLIVE SLLLPGRGNL IITGNMGDV MK
M_prof     KEVLGKELVRQDDARKENVPGVVTGLAWTPVGGDILFIEGTFMPGKGKLT LTGQLGDV MK
M_psy      TQILGKELIRQEEARKENVPGVVTGLAWTPVGGDILFIEGTFMPGTGKLT LTGQLGDV MK
M_therm    PEILGRETVR PDMARKENPPGVVTGLAWTPVGGDILFIEGTFMPGKGKLT LTGQLGDV MK
           :*                               *   ***:*  **  * : *   * * : :  ** : * : **

P_hal       ES IQAAMTVVRNRAEEFRINSDFYEKRDIHVHVPEGATPKDGPSAGAAMVTGLVSSLTGN
E_coli      ES IQAALTVVRARA EKLGINPDFYEKRDIHVHVPEGATPKDGPSAGIAMCTALV SCLTGN
P_aer       ES ITAALT VVRSRASGLIAADFHEKRDIHVHVPEGATPKDGPSAGIGMCTALVSAITQI
B_subt     ESAQA AFSYVR SKTEELGIEPDFHEKYDIHVHVPEGAVPKDGPSAGITMATALVSALTGR
P_aqua     ES IRAAMS VVRARGDSL GIDYETFKTTDVHVHMPEGATPKDGPSAGGALT TATALVSALTGI
T_ther     ESAHAALTYLRAHREEWGLPEGFHKDYDLHIHVHVPEGATPKDGPSAGITITATALASALTGR
T_mar      ESARIALS VVRKMCGE EC--REVFEKNDIHVHVPEGAVPKDGPSAGITITVALYSAVTGK
M_prof     ESAHISMSLARSRLAGTATAFDFT-ASDIHVHVPSGATPKDGPSAGVTLF TAITSLITGK
M_psy      ESAHISLSLVRSLRANTASSFDFT-ASDIHVHVPSGATPKDGPSAGVTLF TALTSLITGK
M_therm    ESAQIALSLIRSLR LATIT TGFDFD-ASDIHVHV PAGATPKDGPSAGV TILTALASLV TGR
           **   : : :  *                               * : * : * : * : * : * : * : * : * : *

P_hal       PVRADVAMTGEITLRGEVLP I GGLKEKLLAAHRGGIKTVIIPKINERDLKEIPDNVLAGL
E_coli      PVRADVAMTGEITLRGQVLP I GGLKEKLLAAHRGGIKTVLIPFENKRDLEEIPDNVIADL
P_aer       PVRADVAMTGEITLRGQVLA I GGLKEKLLAAHRGGIKTVIIP EENVRDLKEIPDNIKSDL
B_subt     AVSREVGMTGEITLRGRVLP I GGLKEKALGAHRAGLKTIIAPKENEKDIEDIPESVREGL
P_aqua     AIRSDIAMTGEITLRGKILRI GGLKEKLLAAHRGGIKHVLIIPATNERDLADIPDNVKAGL
T_ther     PVRMDIAMTGEITLRGRVLP I GGVKEKLLAAHQAGIHRVILPKENAAELKEVP E EILKDL
T_mar      KVR RDVAMTGEITLRGKILPVGGI KEKLLAAKRAGIKKVILPSRNRPDVEKIPKEYLNGM
M_prof     AVDPK LAMTGEITLSGAVLPVGGI KEKVLAAHRAGIKKVILPKENERDLEDVPE D VRNEL
M_psy      TVDPK LAMTGEITLSGAVLPVGGI KEKVLAAHRAGIKKVILPKENERDLEDVPE D ARNEL
M_therm    AVDPTL AMTGEV T LSGAVLPVGGI KEKVLAAHRAGIKTVILPRENERDLEDVPE D VRSDL
           :   : . : * : * : * : * : * : * : * : * : * : * : * : * : * : * : * : *

P_hal       DIHPVTWIDEVLK LALVHPVDSFSVETPKNR-----
E_coli      DIHPVKRIEVLTLALQNEP SGMQVVTAK-----
P_aer       VIKPVK WIDEVLQIALQY APEPLPDAAPE---MVAKDEKREPDSKERISTH
B_subt     TFI LASHLDEVLEHALVGEKK-----
P_aqua     I IQPVATIDEILKVALVTMP TPLKPAKVTV D-KTSGKALR-----N
T_ther     EIHFVVEEVGEVLK LLLLLPPPPPAVQPDRPQPGVGA-----
T_mar      EIVYCSEIQEVLKEAIVR-----
M_prof     KFVPVETIEEVLKEALDIDLHRPAVS YIDKK-MASAGSI-----
M_psy      KFVTVETIEDVLR EALGIDMPRP IVSHNGNG-LVSIQSI-----
M_therm    TFVTVETIEDVLR EALGIELHGPVVPYAGKNRCVPAHNL-----
           :   :   : : *   :


```

**Fig. S15.**

**Lon protease conservation across species.** In the multiple sequence alignment (produced using MAFFT) red indicates the amino acids that are mutated in *P. haloplanktis* adapted to 30°C, green shows amino acid positions that are conserved and grey indicates those amino acids that are not conserved. Three vertical lines separate the three Lon protease domains, i.e., the N-terminal domain, the AAA+ domain, and the protease domain. P\_hal: *P. haloplanktis* TAC125, E\_coli:

*Escherichia coli* str. K-12 substr. MG1655 (gram-negative, mesophile), P\_aer: *Pseudomonas aeruginosa* PAOI (gram-negative, mesophile), B\_subt: *Bacillus subtilis* (gram-positive, mesophile), P\_aqua: *Psychrobacter aquaticus* (gram-negative, marine psychrophilic bacterium), T\_ther: *Thermus thermophilus* (gram-negative, thermophilic bacterium), T\_mar: *Thermotoga maritima* (gram-negative, marine hyperthermophilic bacterium), M\_prof: *Methanolobus profundus* (archaea, mesophilic), M\_psy: *Methanolobus psychrophilus* (archaea, psychrophilic), M\_therm: *Methanoculleus thermophiles* (archaea, thermophilic). We obtained sequences homologous to *P. haloplanktis* Lon protease through a BlastP search against the *nr* database in NCBI. All amino acid sequences shown cover at least 96% of the *P. haloplanktis* Lon protease sequence, are at least 40% identical with *P. haloplanktis* Lon protease, and showed an E-value of 0.0 (BlastP rounds off to 0.0 very small E-values).

**Table S1. List of mutations identified in the *P. haloplanktis* preadapted clone.**

| Chromosome | Position  | Mutation                | Gene                          | Description                                                                                                                                                                                                                                                         |
|------------|-----------|-------------------------|-------------------------------|---------------------------------------------------------------------------------------------------------------------------------------------------------------------------------------------------------------------------------------------------------------------|
| NC_007481  | 2,737,161 | (AGCTCA) <sub>2→3</sub> | PSHA_RS12760                  | Outer membrane channel protein TolC                                                                                                                                                                                                                                 |
| NC_007482  | NA        | Chromosomal duplication |                               | Duplication of whole chromosome 2                                                                                                                                                                                                                                   |
| NC_007482  | 46,491    | Δ6,608 bp               | PSHA_RS15050–<br>PSHA_RS15090 | 9 genes deleted (DEAD/DEAH box helicase, uracil-DNA glycosylase family protein, VOC family protein, hypothetical protein, PepSY domain-containing protein, DUF3325 domain-containing protein, hypothetical protein, YaiI/YqxD family protein, hypothetical protein) |

We compared the genome of the preadapted clone of *P. haloplanktis* to the *P. haloplanktis* wild-type isolate to identify the mutations gained during the preadaptation experiment. NA: not applicable.

**Table S2. Types of mutations identified in clones adapted to different temperatures.**

| Type of mutation    | 30°C         | 28°C        | 26°C       | 22°C       | Control    | Total        |
|---------------------|--------------|-------------|------------|------------|------------|--------------|
| Point mutations     | 423<br>(117) | 79<br>(46)  | 51<br>(45) | 21<br>(21) | 11<br>(11) | 585<br>(240) |
| Indels < 30 nt      |              |             |            |            |            |              |
| Deletion            | 124<br>(35)  | 32<br>(27)  | 11<br>(13) | 1<br>(1)   | 4<br>(4)   | 172<br>(80)  |
| Insertion           | 108<br>(46)  | 7<br>(6)    | 3<br>(2)   | 5<br>(5)   | 9<br>(9)   | 132<br>(68)  |
| Deletions > 30 nt   | 34<br>(11)   | 3<br>(3)    | 3<br>(0)   | 2<br>(2)   | 0<br>(0)   | 42<br>(16)   |
| Tandem duplications | 6<br>(2)     | 0<br>(0)    | 0<br>(0)   | 0<br>(0)   | 0<br>(0)   | 6<br>(2)     |
| IS                  | 0<br>(0)     | 0<br>(0)    | 0<br>(0)   | 0<br>(0)   | 3<br>(3)   | 3<br>(3)     |
| Total               | 695<br>(211) | 121<br>(82) | 68<br>(60) | 29<br>(29) | 27<br>(27) | 940<br>(409) |

Control: control populations evolved at a constant temperature of 15°C

IS: insertional sequence (IS) element integration

In parenthesis we indicate mutations with an independent origin. To identify mutations that originated independently from each other, we counted a mutation only at the lowest temperature where it was first observed, and only once if it occurred in more than one of the three clones isolated from the population adapted to 30°.

**Table S3. Genotypic consequences of mutations identified in clones adapted to different temperatures.**

| Type of mutation   | Effect                          | 30°C         | 28°C        | 26°C       | 22°C       | Control    | Total        |
|--------------------|---------------------------------|--------------|-------------|------------|------------|------------|--------------|
| Point mutations    | Initiator codon variant         | 1<br>(1)     | 0<br>(0)    | 0<br>(0)   | 0<br>(0)   | 0<br>(0)   | 1<br>(1)     |
|                    | Intergenic region               | 23<br>(8)    | 7<br>(2)    | 5<br>(4)   | 3<br>(3)   | 4<br>(4)   | 42<br>(21)   |
|                    | Missense variant                | 364<br>(97)  | 68<br>(41)  | 42<br>(37) | 17<br>(17) | 7<br>(7)   | 498<br>(199) |
|                    | Start codon lost                | 1<br>(1)     | 0<br>(0)    | 0<br>(0)   | 0<br>(0)   | 0<br>(0)   | 1<br>(1)     |
|                    | Stop codon gained               | 19<br>(6)    | 2<br>(2)    | 1<br>(1)   | 1<br>(1)   | 0<br>(0)   | 23<br>(10)   |
|                    | Synonymous variant              | 15<br>(4)    | 2<br>(1)    | 3<br>(3)   | 0<br>(0)   | 0<br>(0)   | 20<br>(8)    |
|                    | <b>Indels &lt; 30 nt</b>        |              |             |            |            |            |              |
| Deletion           | Conservative in-frame deletion  | 51<br>(6)    | 19<br>(18)  | 2<br>(2)   | 1<br>(1)   | 0<br>(0)   | 73<br>(27)   |
|                    | Disruptive in-frame deletion    | 9<br>(4)     | 0<br>(0)    | 1<br>(1)   | 0<br>(0)   | 1<br>(1)   | 11<br>(6)    |
|                    | Frameshifting variant           | 35<br>(17)   | 3<br>(2)    | 3<br>(3)   | 0<br>(0)   | 2<br>(2)   | 43<br>(24)   |
|                    | Intergenic region               | 29<br>(8)    | 8<br>(7)    | 5<br>(5)   | 0<br>(0)   | 1<br>(1)   | 43<br>(21)   |
| Insertion          | Conservative in-frame insertion | 62<br>(21)   | 5<br>(4)    | 3<br>(2)   | 3<br>(3)   | 4<br>(4)   | 77<br>(34)   |
|                    | Disruptive in-frame insertion   | 17<br>(9)    | 0<br>(0)    | 0<br>(0)   | 0<br>(0)   | 0<br>(0)   | 17<br>(9)    |
|                    | Frameshifting variant           | 18<br>(8)    | 1<br>(1)    | 0<br>(0)   | 1<br>(1)   | 1<br>(1)   | 21<br>(11)   |
|                    | Intergenic region               | 11<br>(8)    | 1<br>(1)    | 0<br>(0)   | 1<br>(1)   | 4<br>(4)   | 17<br>(14)   |
| Deletion > 30 nt   | Frameshifting variant           | 4<br>(1)     | 1<br>(0)    | 2<br>(2)   | 1<br>(1)   | 0<br>(0)   | 8<br>(4)     |
|                    | Gene fusion                     | 4<br>(2)     | 0<br>(0)    | 0<br>(0)   | 0<br>(0)   | 0<br>(0)   | 4<br>(2)     |
|                    | Intergenic region               | 11<br>(4)    | 1<br>(0)    | 1<br>(0)   | 1<br>(1)   | 0<br>(0)   | 14<br>(5)    |
|                    | Large deletion                  | 15<br>(4)    | 3<br>(3)    | 0<br>(0)   | 0<br>(0)   | 0<br>(0)   | 18<br>(7)    |
| Tandem duplication | Tandem duplication              | 6<br>(2)     | 0<br>(0)    | 0<br>(0)   | 0<br>(0)   | 0<br>(0)   | 6<br>(2)     |
| IS                 | Insertion sequence              | 0<br>(0)     | 0<br>(0)    | 0<br>(0)   | 0<br>(0)   | 3<br>(3)   | 3<br>(3)     |
| Total              |                                 | 695<br>(211) | 121<br>(82) | 68<br>(60) | 29<br>(29) | 27<br>(27) | 940<br>(409) |

Control: control populations evolved at a constant temperature of 15°C

Conservative in-frame insertion or deletion: one or more codons are inserted or deleted

Disruptive in-frame insertion or deletion: one codon is changed and one or more codons are inserted or deleted

IS: insertional sequence (IS) element integration

In parenthesis we indicate mutations with an independent origin. To identify mutations that originated independently from each other, we counted a mutation only at the lowest temperature where it was first observed, and only once if it occurred in more than one of the three clones isolated from the population adapted to 30°.

**Table S4. COG categories significantly enriched at each temperature.**

| T(°C) | COG                                                                  | obs | exp   | odds ratio | p-value  | FDR      |
|-------|----------------------------------------------------------------------|-----|-------|------------|----------|----------|
| 15    | N: Cell motility                                                     | 10  | 3.9   | 3.38       | 0.004    | 0.049    |
| 15    | L: Replication, recombination and repair                             | 2   | 0.18  | 11.93      | 0.023    | 0.213    |
| 15    | E: Amino acid transport and metabolism                               | 3   | 0.71  | 4.59       | 0.042    | 0.3      |
| 22    | T: Signal transduction mechanisms                                    | 22  | 3.47  | 13.57      | 1.32E-12 | 1.32E-10 |
| 22    | K: Transcription                                                     | 8   | 1     | 9.79       | 2.33E-05 | 7.76E-04 |
| 26    | G: Carbohydrate transport and metabolism                             | 11  | 2.09  | 6.14       | 4.03E-05 | 0.001    |
| 26    | I: Lipid transport and metabolism                                    | 5   | 0.6   | 8.95       | 0.002    | 0.023    |
| 26    | T: Signal transduction mechanisms                                    | 14  | 6.68  | 2.41       | 0.009    | 0.089    |
| 28    | M: Cell wall/membrane/envelope biogenesis                            | 22  | 10.93 | 2.36       | 0.002    | 0.028    |
| 28    | G: Carbohydrate transport and metabolism                             | 8   | 3.45  | 2.45       | 0.037    | 0.284    |
| 30    | C: Energy production and conversion                                  | 53  | 2.18  | 27.2       | 1.47E-08 | 7.33E-07 |
| 30    | O: Post-translational modification, protein turnover, and chaperones | 74  | 28.36 | 2.91       | 1.57E-04 | 0.003    |
| 30    | U: Intracellular trafficking, secretion, and vesicular transport     | 27  | 2.18  | 13.05      | 2.90E-04 | 0.005    |
| 30    | S: Function unknown                                                  | 27  | 10.91 | 2.56       | 0.033    | 0.271    |

For each temperature and COG category, we compared the proportion of mutations assigned to a given COG category at the selected temperature versus at all other temperatures. The table contains only COG categories with a p-value not exceeding 0.05 (one-tailed Fisher test). FDR indicates the false discovery rate according to the Benjamini-Hochberg correction for multiple testing (66).



**Table S5. Frequency at which each of the 20 amino acids is lost through mutation at each temperature.**

| OLD AA | 30°C         | 28°C         | 26°C         | 22°C         | Control |
|--------|--------------|--------------|--------------|--------------|---------|
| ALA    | 12,24        | 12,2         | 13,51        | 11,76        | 14,29   |
| ARG    | 8,16         | <b>14,63</b> | 8,11         | 5,88         | 0       |
| ASN    | 3,06         | 0            | 0            | 0            | 14,29   |
| ASP    | 3,06         | 12,2         | 13,51        | 11,76        | 14,29   |
| CYS    | 1,02         | 0            | 0            | 5,88         | 0       |
| GLN    | 4,08         | 2,44         | 0            | 5,88         | 0       |
| GLU    | 5,1          | 2,44         | 8,11         | 11,76        | 0       |
| GLY    | <b>13,27</b> | 7,32         | <b>16,22</b> | <b>17,65</b> | 0       |
| HIS    | 4,08         | 0            | 0            | 0            | 0       |
| ILE    | 1,02         | 4,88         | 5,41         | 5,88         | 0       |
| LEU    | 9,18         | 2,44         | 8,11         | 0            | 28,57   |
| LYS    | 0            | 0            | 8,11         | 0            | 0       |
| MET    | 3,06         | 7,32         | 5,41         | 5,88         | 28,57   |
| PHE    | 4,08         | 0            | 2,7          | 0            | 0       |
| PRO    | 6,12         | 7,32         | 2,7          | 11,76        | 0       |
| SER    | 11,22        | <b>14,63</b> | 2,7          | 5,88         | 0       |
| THR    | 3,06         | 9,76         | 0            | 0            | 0       |
| TRP    | 3,06         | 0            | 0            | 0            | 0       |
| TYR    | 1,02         | 2,44         | 2,7          | 0            | 0       |
| VAL    | 4,08         | 0            | 2,7          | 0            | 0       |

Control: control populations evolved at a constant temperature of 15°C.

Bold type indicates, for each temperature, the amino acid that gets most frequently lost as a result of mutation across all protein coding genes. Numbers are percentages. For each given temperature, we only counted the mutations that are new at that temperature, in other words we did not count mutations that may have appeared at previous temperatures and that became fixed. For clones adapted to 30°C, if more than one of the sequenced clones belonging to the same population had the same mutation, we only counted the mutation once.

**Table S6. Frequency at which each of the 20 amino acids is gained through mutation at each temperature.**

| NEW AA | 30°C         | 28°C         | 26°C         | 22°C         | Control      |
|--------|--------------|--------------|--------------|--------------|--------------|
| ALA    | 0,00         | 2,44         | 2,70         | 5,88         | 0,00         |
| ARG    | 1,02         | 2,44         | 0,00         | 0,00         | 14,29        |
| ASN    | 3,06         | 7,32         | <b>18,92</b> | 11,76        | 0,00         |
| ASP    | 5,10         | 2,44         | 5,41         | 11,76        | 0,00         |
| CYS    | 6,12         | 2,44         | 2,70         | 0,00         | 0,00         |
| GLN    | 1,02         | 0,00         | 0,00         | 0,00         | 0,00         |
| GLU    | 2,04         | 0,00         | 0,00         | 0,00         | 0,00         |
| GLY    | 1,02         | 4,88         | 2,70         | 0,00         | 0,00         |
| HIS    | 6,12         | 7,32         | 5,41         | 5,88         | 0,00         |
| ILE    | 7,14         | <b>21,95</b> | 8,11         | 5,88         | <b>28,57</b> |
| LEU    | <b>15,31</b> | 19,51        | 10,81        | 11,76        | 0,00         |
| LYS    | 7,14         | 0,00         | 5,41         | 5,88         | 14,29        |
| MET    | 0,00         | 2,44         | 0,00         | 0,00         | 0,00         |
| PHE    | 7,14         | 0,00         | 2,70         | 5,88         | 0,00         |
| PRO    | 1,02         | 7,32         | 2,70         | 0,00         | 0,00         |
| SER    | 11,22        | 7,32         | 8,11         | 11,76        | 0,00         |
| THR    | 9,18         | 2,44         | 8,11         | <b>17,65</b> | 0,00         |
| TRP    | 1,02         | 0,00         | 0,00         | 0,00         | 0,00         |
| TYR    | 6,12         | 7,32         | 2,70         | 5,88         | 14,29        |
| VAL    | 9,18         | 2,44         | 13,51        | 0,00         | <b>28,57</b> |

Control: control populations evolved at a constant temperature of 15°C.

Bold type indicates, for each temperature, the amino acid that is most frequently gained as a result of mutation across all protein coding genes. Numbers indicate percentage. For each given temperature, we only counted the mutations that are new at that temperature, in other words we did not count mutations that may have appeared at previous temperatures and that became fixed. For clones adapted to 30°C, if more than one of the sequenced clones belonging to the same population had the same mutation, we only counted the mutation once.

**Table S7. Copy number differences between clones carrying different mutations affecting the number of copies of chromosome 2.**

| Gene        | ANOVA p-value | Comparison                              | Fold-Change | 95% CI        | Tukey p-value |
|-------------|---------------|-----------------------------------------|-------------|---------------|---------------|
| <i>parA</i> | 8.018E-004    | Partial chr2 deletion/Chr 2 duplication | 0.948       | 0.612 - 1.467 | 8.018E-01     |
|             |               | Partial chr2 deletion/RepA mutation     | 2.358       | 1.524 - 3.65  | 2.200E-05     |
|             |               | Partial chr2 deletion/WT                | 2.156       | 1.114 - 4.173 | 1.965E-03     |
|             |               | Chr 2 duplication/RepA mutation         | 2.488       | 1.66 - 3.728  | 7.890E-05     |
|             |               | Chr 2 duplication/WT                    | 2.274       | 1.2 - 4.311   | 8.208E-04     |
|             |               | RepA mutation/WT                        | 0.914       | 0.482 - 1.733 | 9.896E-01     |
| <i>gluc</i> | 2.193E-003    | Partial chr2 deletion/Chr 2 duplication | 0.544       | 0.341 - 0.866 | 1.093E-03     |
|             |               | Partial chr2 deletion/RepA mutation     | 1.254       | 0.788 - 1.997 | 5.735E-01     |
|             |               | Partial chr2 deletion/WT                | 1.117       | 0.553 - 2.257 | 9.520E-01     |
|             |               | Chr 2 duplication/RepA mutation         | 2.307       | 1.5 - 3.549   | 1.690E-04     |
|             |               | Chr 2 duplication/WT                    | 2.055       | 1.04 - 4.06   | 5.803E-03     |
|             |               | RepA mutation/WT                        | 0.891       | 0.451 - 1.76  | 9.816E-01     |
| <i>repA</i> | 3.111E-003    | Partial chr2 deletion/Chr 2 duplication | 1.048       | 0.622 - 1.766 | 9.642E-01     |
|             |               | Partial chr2 deletion/RepA mutation     | 2.058       | 1.221 - 3.469 | 4.911E-03     |
|             |               | Partial chr2 deletion/WT                | 2.336       | 1.061 - 5.144 | 2.191E-02     |
|             |               | Chr 2 duplication/RepA mutation         | 1.964       | 1.212 - 3.185 | 5.611E-03     |
|             |               | Chr 2 duplication/WT                    | 2.230       | 1.038 - 4.788 | 2.862E-02     |
|             |               | RepA mutation/WT                        | 1.135       | 0.529 - 2.437 | 9.468E-01     |

For each gene, *repA*, *parA* and gluconate transporter (all three located on chromosome 2) we performed one-way ANOVA test to assess differential copy number among 4 groups of samples: wild-type, chromosomal duplication, partial chromosome 2 deletion and *repA* mutation. The null hypothesis is that samples do not differ in their means. The p-value of the one-way ANOVA test is indicated in the ANOVA p-value column. Then we did a Tukey post-hoc test for each pair-wise comparison to test if there are differences in copy number between two given groups tested. Fold-Change column indicates the fold change in copy number between nominator and denominator for each comparison. 95% confidence interval of the ratio is indicated. For each comparison we provide the p-value that resulted from the Tukey post-hoc test.

Wild-type includes the copy number results from the wild-type clone. Chromosome 2 duplication includes the copy number results from 4 clones (*P. haloplanktis* preadapted clone, 22°C-19, 26°C-9, 28°C-23), partial chr2 deletion include the copy number results from 3 clones (28°C-11, 30°C-26.2, 30°C-8.3), and *repA* mutations include the copy number results from 4 clones (28°C-10, 30°C-9.2, 30°C-15.1, 30°C-30.1).

**Table S8. List of most commonly mutated genes at each temperature.**

| Gene ID         | Gene description                                                   | Function                  | Type mutations | N mutations | New mutations |
|-----------------|--------------------------------------------------------------------|---------------------------|----------------|-------------|---------------|
| Controls (15°C) |                                                                    |                           |                |             |               |
| PSHA_RS11640    | Flagellar motor component                                          | Motility                  | SNP, indel     | 5           | 5             |
| PSHA_RS17145    | Gluconate transporter                                              | Amino acid metabolism     | SNP            | 3           | 3             |
| PSHA_RS03600    | Two-component sensor histidine kinase BarA                         | Signal transduction       | SNP            | 2           | 2             |
| PSHA_RS09465    | UvrY/SirA/GacA family response regulator                           | Signal transduction       | indel          | 2           | 2             |
| 22°C            |                                                                    |                           |                |             |               |
| PSHA_RS09465    | UvrY/SirA/GacA family response regulator                           | Signal transduction       | SNP, indel     | 8           | 8             |
| PSHA_RS16945    | Putative GGDEF domain membrane associated protein                  | Signal transduction       | SNP            | 6           | 6             |
| PSHA_RS03600    | Two-component sensor histidine kinase BarA                         | Signal transduction       | SNP, indel     | 5           | 5             |
| PSHA_RS11640    | Flagellar motor component                                          | Motility                  | SNP, indel     | 3           | 3             |
| 26°C            |                                                                    |                           |                |             |               |
| PSHA_RS16945    | Putative GGDEF domain membrane associated protein                  | Signal transduction       | SNP, indel     | 12          | 8             |
| PSHA_RS07030    | Lipopolysaccharide assembly protein LapB                           | Cell wall                 | SNP, indel     | 10          | 10            |
| PSHA_RS08920    | DUF3413 domain-containing protein                                  | Unknown                   | SNP            | 6           | 6             |
| PSHA_RS11640    | Flagellar motor component                                          | Motility                  | SNP, indel     | 5           | 3             |
| PSHA_RS03600    | Two-component sensor histidine kinase BarA                         | Signal transduction       | SNP            | 4           | 3             |
| PSHA_RS09455    | CDP-diacylglycerol--glycerol-3-phosphate 3-phosphatidyltransferase | Phospholipid biosynthesis | SNP, indel     | 3           | 3             |
| 28°C            |                                                                    |                           |                |             |               |
| PSHA_RS04215    | MipA/OmpV family protein                                           | Cell wall                 | SNP, indel     | 20          | 19            |
| PSHA_RS16945    | Putative GGDEF domain membrane associated protein                  | Signal transduction       | SNP, indel     | 16          | 5             |
| PSHA_RS07030    | Lipopolysaccharide assembly protein LapB                           | Cell wall                 | SNP            | 13          | 6             |
| PSHA_RS17540    | Putative replication protein (repA-like)                           | Replication               | SNP            | 11          | 10            |
| PSHA_RS08920    | DUF3413 domain-containing protein                                  | Unknown                   | SNP            | 6           | 2             |
| PSHA_RS10175    | Lon protease                                                       | Protease                  | SNP, indel     | 5           | 5             |
| PSHA_RS11640    | Flagellar motor component                                          | Motility                  | SNP, indel     | 4           | 0             |
| PSHA_RS12300    | UDP-3-O-[3-hydroxymyristoyl] N-acetylglucosamine deacetylase       | Cell wall                 | SNP            | 4           | 3             |
| PSHA_RS12695    | ATP-dependent zinc protease                                        | Protease                  | indel          | 4           | 4             |
| PSHA_RS09455    | CDP-diacylglycerol--glycerol-3-phosphate 3-                        | Phospholipid biosynthesis | SNP, indel     | 3           | 1             |

phosphatidyltransferase

| 30°C         |                                                                       |                                  |                      |         |         |
|--------------|-----------------------------------------------------------------------|----------------------------------|----------------------|---------|---------|
| PSHA_RS10175 | Lon protease                                                          | Protease                         | SNP, indel           | 72 (25) | 60 (21) |
| PSHA_RS17540 | Putative replication protein (repA-like)                              | Replication                      | SNP                  | 58 (21) | 38 (14) |
| PSHA_RS04215 | MipA/OmpV family protein                                              | Cell wall                        | SNP, indel           | 48 (16) | 9 (3)   |
| PSHA_RS16945 | Putative GGDEF domain membrane associated protein                     | Signal transduction              | SNP, indel           | 41 (14) | 6 (2)   |
| PSHA_RS07030 | Lipopolysaccharide assembly protein LapB                              | Cell wall                        | SNP                  | 27 (10) | 2 (1)   |
| PSHA_RS08920 | DUF3413 domain-containing protein                                     | Unknown                          | SNP                  | 23 (8)  | 9 (3)   |
| PSHA_RS05885 | TonB2 protein                                                         | Transport                        | indel                | 17 (9)  | 17 (9)  |
| PSHA_RS14760 | Membrane-bound ATP synthase, F1 sector, beta-subunit                  | Energy production and conversion | SNP                  | 16 (8)  | 16 (8)  |
| PSHA_RS12300 | UDP-3-O-[3-hydroxymyristoyl] N-acetylglucosamine deacetylase          | Cell wall                        | SNP                  | 15 (5)  | 9 (3)   |
| PSHA_RS12695 | ATP-dependent zinc protease                                           | Protease                         | indel, deletion      | 15 (5)  | 9 (3)   |
| PSHA_RS12760 | Outer membrane protein tolC precursor                                 | Transport                        | SNP                  | 13 (5)  | 13 (5)  |
|              | Chromosome 2 deletion                                                 |                                  | large deletion       | 12 (4)  | 6 (2)   |
| PSHA_RS04170 | Sensory histidine kinase in two-component regulatory system with RstA | Signal transduction              | SNP, indel           | 12 (5)  | 12 (5)  |
| PSHA_RS09455 | CDP-diacylglycerol--glycerol-3-phosphate 3-phosphatidyltransferase    | Phospholipid biosynthesis        | SNP, indel           | 12 (4)  | 3(1)    |
| PSHA_RS10020 | Outer membrane protein assembly factor Bama                           | Cell wall                        | SNP                  | 12 (4)  | 12 (4)  |
| PSHA_RS11640 | Flagellar motor component                                             | Motility                         | SNP, indel           | 12 (4)  | 12 (4)  |
| PSHA_RS05005 | Peptidoglycan glycosyltransferase MrdB                                | Cell wall                        | SNP                  | 11 (5)  | 11 (5)  |
| PSHA_RS07245 | DUF1852 domain-containing protein                                     | Unknown                          | SNP                  | 11 (6)  | 11 (6)  |
| PSHA_RS14770 | Membrane-bound ATP synthase, F1 sector, alpha-subunit                 | Energy production and conversion | SNP                  | 11 (5)  | 11 (5)  |
| PSHA_RS01875 | Type IV-A pilus assembly ATPase PilB                                  | Motility                         | indel                | 8 (3)   | 8 (3)   |
| PSHA_RS12850 | DUF885 domain-containing protein                                      | Unknown                          | indel                | 7 (5)   | 7 (5)   |
| PSHA_RS13195 | SUMF1/EgtB/PvdOfamily nonheme iron enzyme                             | Unknown                          | SNP, indel, deletion | 8 (3)   | 8 (3)   |
| PSHA_RS16885 | Conserved protein of unknown function                                 | Unknown                          | SNP                  | 9 (3)   | 9 (3)   |

The number of mutations identified at 30°C corresponds to mutations found in all clones, irrespective of whether they were found in more than one of the three clones we had sequenced from the same population at 30°C. In parentheses we indicated the number of independent mutations at 30°C, that is, if more than one of the three clones had the same mutation, we only counted the mutation once. New mutations refer to mutations that appear for the first time at that temperature.

**Table S9. List of Lon protease mutations in clones adapted to 30°C.**

| Position | Mutation Type  | Effect                    | Clone                                                                                                                                                                                                                                                                                                                                            |
|----------|----------------|---------------------------|--------------------------------------------------------------------------------------------------------------------------------------------------------------------------------------------------------------------------------------------------------------------------------------------------------------------------------------------------|
| 2177758  | SNP            | His505Tyr                 | 7.2                                                                                                                                                                                                                                                                                                                                              |
| 2178397  | SNP            | Arg292Cys                 | 17.1, 17.2, 17.3                                                                                                                                                                                                                                                                                                                                 |
| 2178399  | SNP            | Val291Glu                 | 2.3                                                                                                                                                                                                                                                                                                                                              |
| 2178425  | 9 nt insertion | Met280_Met281insMetSerPro | 2.1, 2.2, 3.1, 3.2, 3.3, 8.1, 8.2, 8.3, 9.1, 9.2, 9.3, 10.1, 10.2, 10.2b, 12.1, 12.2, 12.3, 14.1, 14.2, 14.3, 15.1, 15.2, 15.3, 16.1, 16.2, 16.3, 18.1, 18.2, 18.3, 19.1, 19.2, 19.3, 21.1, 21.2, 21.3, 22.1, 22.2, 22.3, 23.1, 23.2, 23.3, 24.1, 24.2, 24.3, 25.1, 25.2, 26.1, 26.2, 26.3, 27.1, 27.2, 27.3, 28.1, 28.2, 28.3, 29.1, 29.2, 29.3 |
| 2178433  | 6 nt deletion  | Leu278 Lys279del          | 4.1, 4.2, 4.3                                                                                                                                                                                                                                                                                                                                    |
| 2178597  | SNP            | Gln225Leu                 | 6.1, 6.2, 6.3                                                                                                                                                                                                                                                                                                                                    |
| 2179014  | SNP            | Gly86Val                  | 20.1, 20.2, 20.3                                                                                                                                                                                                                                                                                                                                 |
| 2179220  | intergenic     | NA                        | 6.2                                                                                                                                                                                                                                                                                                                                              |

**Table S10. *E. coli* BL21 cells expressing mutated Lon protease grow to higher population density at 40°C.**

| Temperature | Group 1       | Group 2       | W   | p-value |
|-------------|---------------|---------------|-----|---------|
| 30°C        | Lon mut       | Empty plasmid | 12  | <0.001  |
|             | Lon mut       | Lon wt        | 58  | 0.795   |
|             | Empty plasmid | Lon wt        | 22  | 0.001   |
| 37°C        | Lon mut       | Empty plasmid | 59  | 0.779   |
|             | Lon mut       | Lon wt        | 78  | 0.378   |
|             | Empty plasmid | Lon wt        | 40  | 0.970   |
| 40°C        | Lon mut       | Empty plasmid | 102 | 0.044   |
|             | Lon mut       | Lon wt        | 115 | 0.006   |
|             | Empty plasmid | Lon wt        | 61  | 0.743   |

We cloned Lon protease wild-type and mutated Lon protease (with the 3aa insertion) into a plasmid and expressed the protease in *E. coli* BL21 cells. To assess the effect of the Lon protease mutation at different temperatures we measured growth curves of *E. coli* BL21 cells carrying the different plasmid variants. We measured each growth curve in 12 replicate populations derived from the same Lon protease-expressing clone. We performed pairwise comparisons of the maximum population density between *E. coli* BL21 cells carrying different plasmid variants. To assess statistical significance we performed a one-sided Wilcoxon rank-sum test.

**Table S11. List of oligonucleotide primers used in this study.**

| Oligo name    | Sequence                                         | Purpose                                                                                                                              |
|---------------|--------------------------------------------------|--------------------------------------------------------------------------------------------------------------------------------------|
| 1597378_fw    | 5'-AGCTGTGGCAGTTTTTGGGG-3'                       | Primer specific to <i>P. haloplanktis</i> TAC125 PSHA_RS07527 gene. Control for contamination during experimental evolution          |
| 1597378_rv    | 5'-CATTGCTATTGCTGTTAAGCGG-3'                     | Primer specific to <i>P. haloplanktis</i> TAC125 PSHA_RS07527 gene. Control for contamination during experimental evolution          |
| 398078_fw     | 5'-CATTACTTACAGGGGCTCTGG-3'                      | Primer specific to <i>P. haloplanktis</i> TAC125 PSHA_RS01895 gene. Control for contamination during experimental evolution          |
| 398078_rv     | 5'-GCTCCGTGATTCATCTCGC-3'                        | Primer specific to <i>P. haloplanktis</i> TAC125 PSHA_RS01895 gene. Control for contamination during experimental evolution          |
| 16s_fw        | 5'-GATCATGGCTCAGATTGAACGC-3'                     | Primer to amplify 16S from <i>E. coli</i> and <i>P. haloplanktis</i> TAC125. Control for contamination during experimental evolution |
| 16s_rv        | 5'-AGGCACCAAACCATCTCTGG-3'                       | Primer to amplify 16S from <i>E. coli</i> and <i>P. haloplanktis</i> TAC125. Control for contamination during experimental evolution |
| EG11498_fw    | 5'-AACAGGATGTGAACCGACCC-3'                       | Primer specific to <i>E. coli</i> EG11498 gene. Control for contamination during experimental evolution                              |
| EG11498_rv    | 5'-GGCTGTGGAGGATTTTTGCG-3'                       | Primer specific to <i>E. coli</i> EG11498 gene. Control for contamination during experimental evolution                              |
| EG11973_fw    | 5'-GCGGACATTGTCATTTTCGGG-3'                      | Primer specific to <i>E. coli</i> EG11973 gene. Control for contamination during experimental evolution                              |
| EG11973_rv    | 5'-AACCACTTCAGGGCTAACGG-3'                       | Primer specific to <i>E. coli</i> EG11973 gene. Control for contamination during experimental evolution                              |
| Lon Ph fw1    | 5'-GATATACATCTCGAGATGACGCTTGAGAGAACC<br>GATCG-3' | Primer to amplify LonPh <sub>wt</sub> and LonPh <sub>14.1</sub> from Ph gDNA                                                         |
| Lon Ph rv1    | 5'-CTGATGCCTCTAGATTATCGGTTTTTCGGCGTT TCG-<br>3'  | Primer to amplify LonPh <sub>wt</sub> and LonPh <sub>14.1</sub> from Ph gDNA                                                         |
| Seq 1523 Phrv | 5'-GCCATTACGCTTAACTTGCTTGG-3'                    | Primer to check for the 3 aa insertion on Lon Ph                                                                                     |



|                 |                                                                 |                                                                                                                     |
|-----------------|-----------------------------------------------------------------|---------------------------------------------------------------------------------------------------------------------|
| fwpUCN<br>empty | 5'-GAGATATACATCTCGAGTCTAGAGGCATCAAAT<br>AAAACGAAAGG-3'          | Primer to remove EYFP from pUCNOmpA<br>and obtain an empty vector                                                   |
| rvpUCN<br>empty | 5'-GATGCCTCTAGACTCGAGATGTATATCTCCTTC-3'                         | Primer to remove EYFP from pUCNOmpA<br>and obtain an empty vector                                                   |
| A PhLonpUC      | 5'-GATTTAAGAAGGAGATATACATCTCGAGATGACGC<br>TTGAGAGAACCGATCGAG-3' | Primer to amplify LonPh <sub>wt</sub> or LonPh <sub>14.1</sub> for<br>Gibson assembly in pUCNOmpA plasmid<br>series |
| B PhLonpUC      | 5'-CTCGATCGGTTCTCTCAAGCGTCATCTCGAGATGT<br>ATATCTCCTTCTTAAATC-3' | Primer to amplify pUCNOmpA plasmid for<br>Gibson assembly with LonPh <sub>wt</sub> and<br>LonPh <sub>14.1</sub>     |
| C PhLonpUC      | 5'-GTCGAAACGCCGAAAAACCGATAATCTAGAGGCAT<br>C AAATAAACGAAAGGC-3'  | Primer to amplify pUCNOmpA plasmid for<br>Gibson assembly with LonPh <sub>wt</sub> and<br>LonPh <sub>14.1</sub>     |
| D PhLonpUC      | 5'-GCCTTTCGTTTTATTTGATGCCTCTAGATTATCGGT<br>TTTTCGGCGTTTCGAC-3'  | Primer to amplify LonPh <sub>wt</sub> or LonPh <sub>14.1</sub> for<br>Gibson assembly in pUCNOmpA plasmid<br>series |
| seqR2           | 5'-ACAAACTAGCAACACCAGAAC-3'                                     | Primer to sequence pUCNOmpA plasmids                                                                                |
| seqF2           | 5'-ATTTTGGATGATAACGAGGCG-3'                                     | Primer to sequence pUCNOmpA plasmids                                                                                |

(Ph: *P. haloplanktis*; gDNA: genomic DNA)

**Table S12. List of plasmids used in this study.**

| Plasmid                        | Resistance marker | Reference  |
|--------------------------------|-------------------|------------|
| pUCNOmpA-EYFP-1                | Kan               | Fig. S14   |
| pUCNOmpA                       | Kan               | This study |
| pUCNOmpA-LonPh <sub>wt</sub>   | Kan               | This study |
| pUCNOmpA-LonPh <sub>14.1</sub> | Kan               | This study |

**Table S13. List of oligonucleotide primers and genes used for qPCR.**

| Gene                                 | Forward primer           | Reverse Primer           | Fragment size amplified | Primer efficiency | Primer concentration (nM) |
|--------------------------------------|--------------------------|--------------------------|-------------------------|-------------------|---------------------------|
| <i>rpoB</i> (PSHA_RS01095)           | GTGCGTGTAGAA<br>CGTGCTGT | AACTGAGACGAG<br>CCGAAGAA | 128 bp                  | 102%              | 200                       |
| <i>gyrA</i> (PSHA_RS06995)           | AAAATGCCTGAA<br>GGACAACG | CGACTCTTCGCTG<br>GGTAGTC | 125 bp                  | 107%              | 200                       |
| gluconate transporter (PSHA_RS17145) | GCGAGAAAAACG<br>CTAACTGG | ACACTACCACCGC<br>CTTTACG | 130 bp                  | 82%               | 200                       |
| <i>repA</i> (PSHA_RS17540)           | ACTTTAACAGCGC<br>CCAAGAA | CTGCATAACGCCA<br>AAGATGA | 81 bp                   | 99%               | 300                       |
| <i>recA</i> (PSHA_RS03395)           | CAGATACTGGCG<br>AACAAGCA | TCGCCTTCAATTT<br>CAGCTTT | 118 bp                  | 109%              | 400                       |
| <i>parA</i> (PSHA_RS14855)           | GCTGAAGTTGCCG<br>AAAAGTC | TCGTGGCGTCTTT<br>TTAAGGT | 149 bp                  | 102%              | 400                       |

(Primer efficiency larger than 100% indicates that there might be inhibitors of the polymerase enzyme)

**Data S1. (separate file)**

List of mutations identified in all sequenced clones across temperatures.

**Data S2. (separate file)**

List of types of mutations identified in all sequenced clones across temperatures.

**Data S3. (separate file)**

List of genes mutated in this study and their corresponding classification into functions.

## REFERENCES AND NOTES

1. B. R. Scheffers, L. De Meester, T. C. L. Bridge, A. A. Hoffmann, J. M. Pandolfi, R. T. Corlett, S. H. M. Butchart, P. Pearce-Kelly, K. M. Kovacs, D. Dudgeon, M. Pacifici, C. Rondinini, W. B. Foden, T. G. Martin, C. Mora, D. Bickford, J. E. M. Watson, The broad footprint of climate change from genes to biomes to people. *Science* **354**, aaf7671 (2016).
2. IPCC, *Climate Change 2013: The Physical Science Basis Working Group I Contribution to the Fifth Assessment Report of the Intergovernmental Panel on Climate Change* (Cambridge Univ. Press, 2013).
3. S. Drijfhout, S. Bathiany, C. Beaulieu, V. Brovkin, M. Claussen, C. Huntingford, M. Scheffer, G. Sgubin, D. Swingedouw, Catalogue of abrupt shifts in Intergovernmental Panel on Climate Change climate models. *Proc. Natl. Acad. Sci. U.S.A.* **112**, E5777–E5786 (2015).
4. M. van de Pol, S. Jenouvrier, J. H. C. Cornelissen, M. E. Visser, Behavioural, ecological and evolutionary responses to extreme climatic events: Challenges and directions. *Philos. Trans. R. Soc. Lond. B Biol. Sci.* **372**, 20160134 (2017).
5. D. A. Smale, T. Wernberg, E. C. J. Oliver, M. Thomsen, B. P. Harvey, S. C. Straub, M. T. Burrows, L. V. Alexander, J. A. Benthuisen, M. G. Donat, M. Feng, A. J. Hobday, N. J. Holbrook, S. E. Perkins-Kirkpatrick, H. A. Scannell, A. Sen Gupta, B. L. Payne, P. J. Moore, Marine heatwaves threaten global biodiversity and the provision of ecosystem services. *Nat. Clim. Chang.* **9**, 306–312 (2019).
6. C. Laufkötter, J. Zscheischler, T. L. Frölicher, High-impact marine heatwaves attributable to human-induced global warming. *Science* **369**, 1621–1625 (2020).
7. S. Blackburn, B. Van Heerwaarden, V. Kellermann, C. M. Sgro, Evolutionary capacity of upper thermal limits: Beyond single trait assessments. *J. Exp. Biol.* **217**, 1918–1924 (2014).
8. W. E. Bradshaw, C. M. Holzapfel, Evolutionary response to rapid climate change. *Science* **312**, 1477–1478 (2006).

9. M. B. Araújo, F. Ferri-Yáñez, F. Bozinovic, P. A. Marquet, F. Valladares, S. L. Chown, Heat freezes niche evolution. *Ecol. Lett.* **16**, 1206–1219 (2013).
10. R. Morgan, M. H. Finnøen, H. Jensen, C. Pélabon, F. Jutfelt, Low potential for evolutionary rescue from climate change in a tropical fish. *Proc. Natl. Acad. Sci. U.S.A.* **117**, 33365–33372 (2020).
11. G. Bell, Evolutionary rescue and the limits of adaptation. *Philos. Trans. R. Soc. Lond. B Biol. Sci.* **368**, 20120080 (2013).
12. A. Gonzalez, G. Bell, Evolutionary rescue and adaptation to abrupt environmental change depends upon the history of stress. *Philos. Trans. R. Soc. Lond. B Biol. Sci.* **368**, 20120079 (2013).
13. G. Bell, Evolutionary rescue. *Annu. Rev. Ecol. Evol. Syst.* **48**, 605–627 (2017).
14. G. Bell, A. Gonzalez, Evolutionary rescue can prevent extinction following environmental change. *Ecol. Lett.* **12**, 942–948 (2009).
15. J. Ramsayer, O. Kaltz, M. E. Hochberg, Evolutionary rescue in populations of *Pseudomonas fluorescens* across an antibiotic gradient. *Evol. Appl.* **6**, 608–616 (2013).
16. P. Samani, G. Bell, Adaptation of experimental yeast populations to stressful conditions in relation to population size. *J. Evol. Biol.* **23**, 791–796 (2010).
17. H. A. Lindsey, J. Gallie, S. Taylor, B. Kerr, Evolutionary rescue from extinction is contingent on a lower rate of environmental change. *Nature* **494**, 463–467 (2013).
18. O. Tenaillon, A. Rodríguez-Verdugo, R. L. Gaut, P. McDonald, A. F. Bennett, A. D. Long, B. S. Gaut, The molecular diversity of adaptive convergence. *Science* **335**, 457–461 (2012).
19. M. Elias, G. Wieczorek, S. Rosenne, D. S. Tawfik, The universality of enzymatic rate-temperature dependency. *Trends Biochem. Sci.* **39**, 1–7 (2014).
20. F. Rigoldi, S. Donini, A. Redaelli, E. Parisini, A. Gautieri, Review: Engineering of thermostable enzymes for industrial applications. *APL Bioeng.* **2**, 011501 (2018).

21. T. E. Sandberg, M. Pedersen, R. A. Lacroix, A. Ebrahim, M. Bonde, M. J. Herrgard, B. O. Palsson, M. Sommer, A. M. Feist, Evolution of *Escherichia coli* to 42°C and subsequent genetic engineering reveals adaptive mechanisms and novel mutations. *Mol. Biol. Evol.* **31**, 2647–2662 (2014).
22. D. E. Deatherage, J. L. Kepner, A. F. Bennett, R. E. Lenski, J. E. Barrick, Specificity of genome evolution in experimental populations of *Escherichia coli* evolved at different temperatures. *Proc. Natl. Acad. Sci. U.S.A.* **114**, E1904–E1912 (2017).
23. A. A. Hoffmann, C. M. Sgró, Climate change and evolutionary adaptation. *Nature* **470**, 479–485 (2011).
24. A. N. Geerts, J. Vanoverbeke, B. Vanschoenwinkel, W. Van Doorslaer, H. Feuchtmayr, D. Atkinson, B. Moss, T. A. Davidson, C. D. Sayer, L. De Meester, Rapid evolution of thermal tolerance in the water flea *Daphnia*. *Nat. Clim. Chang.* **5**, 665–668 (2015).
25. M. Thomann, E. Imbert, R. C. Engstrand, P. O. Cheptou, Contemporary evolution of plant reproductive strategies under global change is revealed by stored seeds. *J. Evol. Biol.* **28**, 766–778 (2015).
26. F. Mallard, V. Nolte, R. Tobler, M. Kapun, C. Schlötterer, A simple genetic basis of adaptation to a novel thermal environment results in complex metabolic rewiring in *Drosophila*. *Genome Biol.* **19**, 119 (2018).
27. A. F. Bennett, K. M. Dao, R. E. Lenski, Rapid evolution in response to high-temperature selection. *Nature* **346**, 79–81 (1990).
28. A. F. Bennett, R. E. Lenski, J. E. Mittler, Evolutionary adaptation to temperature. I. Fitness responses of *Escherichia coli* to changes in its thermal environment. *Evolution* **46**, 16–30 (1992).
29. J. A. Mongold, A. F. Bennett, R. E. Lenski, Evolutionary adaptation to temperature. IV. Adaptation of *Escherichia coli* at a niche boundary. *Evolution* **50**, 35–43 (1996).
30. B. Rudolph, K. M. Gebendorfer, J. Buchner, J. Winter, Evolution of *Escherichia coli* for growth at high temperatures. *J. Biol. Chem.* **285**, 19029–19034 (2010).

31. K. S. Siddiqui, T. J. Williams, D. Wilkins, S. Yau, M. A. Allen, M. V. Brown, F. M. Lauro, R. Cavicchioli, Psychrophiles. *Annu. Rev. Earth Planet. Sci.* **41**, 87–115 (2013).
32. T. J. Williams, F. M. Lauro, H. Ertan, D. W. Burg, A. Poljak, M. J. Raftery, R. Cavicchioli, Defining the response of a microorganism to temperatures that span its complete growth temperature range (−2°C to 28°C) using multiplex quantitative proteomics. *Environ. Microbiol.* **13**, 2186–2203 (2011).
33. E. Parrilli, P. Tedesco, M. Fondi, M. L. Tutino, A. Lo Giudice, D. de Pascale, R. Fani, The art of adapting to extreme environments: The model system *Pseudoalteromonas*. *Phys. Life Rev.*, 137–161 (2019).
34. C. Médigue, E. Krin, G. Pascal, V. Barbe, A. Bernsel, P. N. Bertin, F. Cheung, S. Cruveiller, S. D’Amico, A. Duilio, G. Fang, G. Feller, C. Ho, S. Mangenot, G. Marino, J. Nilsson, E. Parrilli, E. P. C. Rocha, Z. Rouy, A. Sekowska, M. L. Tutino, D. Vallenet, G. von Heijne, A. Danchin, Coping with cold: The genome of the versatile marine Antarctica bacterium *Pseudoalteromonas haloplanktis* TAC125. *Genome Res.* **15**, 1325–1335 (2005).
35. M. L. Tutino, A. Duilio, R. Parrilli, E. Remaut, G. Sannia, G. Marino, A novel replication element from an Antarctic plasmid as a tool for the expression of proteins at low temperature. *Extremophiles* **5**, 257–64 (2001).
36. W. Qi, A. Colarusso, M. Olombrada, E. Parrilli, A. Patrignani, M. L. Tutino, M. Toll-Riera, New insights on *Pseudoalteromonas haloplanktis* TAC125 genome organization and benchmarks of genome assembly applications using next and third generation sequencing technologies. *Sci. Rep.* **9**, 16444 (2019).
37. F. Sannino, M. Giuliani, U. Salvatore, G. A. Apuzzo, D. de Pascale, R. Fani, M. Fondi, G. Marino, M. L. Tutino, E. Parrilli, A novel synthetic medium and expression system for subzero growth and recombinant protein production in *Pseudoalteromonas haloplanktis* TAC125. *Appl. Microbiol. Biotechnol.* **101**, 725–734 (2017).



38. F. Piette, S. D'Amico, G. Mazzucchelli, A. Danchin, P. Leprince, G. Feller, Life in the cold: A proteomic study of cold-repressed proteins in the antarctic bacterium *Pseudoalteromonas haloplanktis* TAC125. *Appl. Environ. Microbiol.* **77**, 3881–3883 (2011).
39. M. J. J. Angilletta, *Thermal Adaptation: A Theoretical and Empirical Synthesis* (Oxford Univ. Press, 2009).
40. R. P. R. Metpally, B. V. B. Reddy, Comparative proteome analysis of psychrophilic versus mesophilic bacterial species: Insights into the molecular basis of cold adaptation of proteins. *BMC Genomics* **10**, 11 (2009).
41. E. Gur, The Lon AAA+ protease. *Subcell. Biochem.* **66**, 35–51 (2013).
42. J. Schymkowitz, J. Borg, F. Stricher, R. Nys, F. Rousseau, L. Serrano, The FoldX web server: An online force field. *Nucleic Acids Res.* **33**, W382–W388 (2005).
43. K. A. Geiler-Samerotte, M. F. Dion, B. A. Budnik, S. M. Wang, D. L. Hartl, D. A. Drummond, Misfolded proteins impose a dosage-dependent fitness cost and trigger a cytosolic unfolded protein response in yeast. *Proc. Natl. Acad. Sci. U.S.A.* **108**, 680–685 (2011).
44. P. Leuenberger, S. Ganscha, A. Kahraman, V. Cappelletti, P. J. Boersema, C. Von Mering, M. Claassen, P. Picotti, Cell-wide analysis of protein thermal unfolding reveals determinants of thermostability. *Science* **355**, eaai7825 (2017).
45. H. Lee, E. Popodi, H. Tang, P. L. Foster, Rate and molecular spectrum of spontaneous mutations in the bacterium *Escherichia coli* as determined by whole-genome sequencing. *Proc. Natl. Acad. Sci. U.S.A.* **109**, E2774–E2783 (2012).
46. G. Bell, S. Collins, Adaptation, extinction and global change. *Evol. Appl.* **1**, 3–16 (2008).
47. P. R. Grant, B. R. Grant, R. B. Huey, M. T. J. Johnson, A. H. Knoll, J. Schmitt, Evolution caused by extreme events. *Philos. Trans. R. Soc. Lond. B Biol. Sci.* **372**, 20160146 (2017).

48. J. A. Welbergen, S. M. Klose, N. Markus, P. Eby, Climate change and the effects of temperature extremes on Australian flying-foxes. *Proc. R. Soc. B Biol. Sci.* **275**, 419–425 (2008).
49. T. Wernberg, S. Bennett, R. C. Babcock, T. De Bettignies, K. Cure, M. Depczynski, F. Dufois, J. Fromont, C. J. Fulton, R. K. Hovey, E. S. Harvey, T. H. Holmes, G. A. Kendrick, B. Radford, J. Santana-Garcon, B. J. Saunders, D. A. Smale, M. S. Thomsen, C. A. Tuckett, F. Tuya, M. A. Vanderklift, S. Wilson, Climate-driven regime shift of a temperate marine ecosystem. *Science* **353**, 169–172 (2016).
50. T. P. Hughes, J. T. Kerry, A. H. Baird, S. R. Connolly, A. Dietzel, C. M. Eakin, S. F. Heron, A. S. Hoey, M. O. Hoogenboom, G. Liu, M. J. McWilliam, R. J. Pears, M. S. Pratchett, W. J. Skirving, J. S. Stella, G. Torda, Global warming transforms coral reef assemblages. *Nature* **556**, 492–496 (2018).
51. P. Soroye, T. Newbold, J. Kerr, Climate change contributes to widespread declines among bumble bees across continents. *Science* **367**, 685–688 (2020).
52. T. L. Frölicher, E. M. Fischer, N. Gruber, Marine heatwaves under global warming. *Nature* **560**, 360–364 (2018).
53. B. S. Walsh, S. R. Parratt, A. A. Hoffmann, D. Atkinson, R. R. Snook, A. Bretman, T. A. R. Price, The impact of climate change on fertility. *Trends Ecol. Evol.* **34**, 249–259 (2019).
54. K. Sprouffske, A. Wagner, Growthcurver: An R package for obtaining interpretable metrics from microbial growth curves. *BMC Bioinformatics* **17**, 172 (2016).
55. A. San Millan, R. Peña-Miller, M. Toll-Riera, Z. V. Halbert, A. R. McLean, B. S. Cooper, R. C. MacLean, Positive selection and compensatory adaptation interact to stabilize non-transmissible plasmids. *Nat. Commun.* **5**, 5208 (2014).
56. H. Li, R. Durbin, Fast and accurate long-read alignment with Burrows-Wheeler transform. *Bioinformatics* **26**, 589–595 (2010).
57. M. A. Depristo, E. Banks, R. Poplin, K. V. Garimella, J. R. Maguire, C. Hartl, A. A. Philippakis, G. Del Angel, M. A. Rivas, M. Hanna, A. McKenna, T. J. Fennell, A. M. Kernytsky, A. Y. Sivachenko,

- K. Cibulskis, S. B. Gabriel, D. Altshuler, M. J. Daly, A framework for variation discovery and genotyping using next-generation DNA sequencing data. *Nat. Genet.* **43**, 491–498 (2011).
58. H. Li, A statistical framework for SNP calling, mutation discovery, association mapping and population genetical parameter estimation from sequencing data. *Bioinformatics* **27**, 2987–2993 (2011).
59. K. Ye, M. H. Schulz, Q. Long, R. Apweiler, Z. Ning, Pindel: A pattern growth approach to detect break points of large deletions and medium sized insertions from paired-end short reads. *Bioinformatics* **25**, 2865–2871 (2009).
60. X. Fan, T. E. Abbott, D. Larson, K. Chen, BreakDancer: Identification of genomic structural variation from paired-end read mapping. *Curr. Protoc. Bioinformatics* **45**, 15.6.1–15.6.11 (2014).
61. P. Cingolani, A. Platts, L. L. Wang, M. Coon, T. Nguyen, L. Wang, S. J. Land, X. Lu, D. M. Ruden, A program for annotating and predicting the effects of single nucleotide polymorphisms, SnpEff: SNPs in the genome of *Drosophila melanogaster* strain w1118; iso-2; iso-3. *Fly* **6**, 80–92 (2012).
62. K. Okonechnikov, A. Conesa, F. García-Alcalde, Qualimap 2: Advanced multi-sample quality control for high-throughput sequencing data. *Bioinformatics* **32**, 292–4 (2016).
63. D. E. Deatherage, J. E. Barrick, Identification of mutations in laboratory-evolved microbes from next-generation sequencing data using breseq. *Methods Mol. Biol.* **1151**, 165–88 (2014).
64. R. L. Tatusov, M. Y. Galperin, D. A. Natale, E. V. Koonin, The COG database: A tool for genome-scale analysis of protein functions and evolution. *Nucleic Acids Res.* **28**, 33–36 (2000).
65. R. A. Fisher, On the Interpretation of  $\chi^2$  from contingency tables, and the calculation of P. *J. R. Stat. Soc.* **85**, 87 (1922).
66. Y. Benjamini, Y. Hochberg, Controlling the false discovery rate: A practical and powerful approach to multiple testing. *J. R. Stat. Soc. B* **57**, 289–300 (1995).

67. A. Waterhouse, M. Bertoni, S. Bienert, G. Studer, G. Tauriello, R. Gumienny, F. T. Heer, T. A. P. De Beer, C. Rempfer, L. Bordoli, R. Lepore, T. Schwede, SWISS-MODEL: Homology modelling of protein structures and complexes. *Nucleic Acids Res.* **46**, W296–W303 (2018).
68. A. Roy, A. Kucukural, Y. Zhang, I-TASSER: A unified platform for automated protein structure and function prediction. *Nat. Protoc.* **5**, 725–738 (2010).
69. Jmol: An open-source Java viewer for chemical structures in 3D; <http://jmol.sourceforge.net/>.
70. A. Zaslaver, A. Bren, M. Ronen, S. Itzkovitz, I. Kikoin, S. Shavit, W. Liebermeister, M. G. Surette, U. Alon, A comprehensive library of fluorescent transcriptional reporters for *Escherichia coli*. *Nat. Methods* **3**, 623–628 (2006).
71. D. G. Gibson, L. Young, R. Y. Chuang, J. C. Venter, C. A. Hutchison III, H. O. Smith, Enzymatic assembly of DNA molecules up to several hundred kilobases. *Nat. Methods* **6**, 343–345 (2009).
72. R Core Team, *R: A Language and Environment for Statistical Computing* (2020); [www.r-project.org](http://www.r-project.org).
73. G. Feller, C. Gerday, Psychrophilic enzymes: Hot topics in cold adaptation. *Nat. Rev. Microbiol.* **1**, 200–208 (2003).
74. W. Vollmer, M. Von Rechenberg, J. V. Höltje, Demonstration of molecular interactions between the murein polymerase PBP1B, the lytic transglycosylase MltA, and the scaffolding protein MipA of *Escherichia coli*. *J. Biol. Chem.* **274**, 6726–6734 (1999).
75. J.-V. Höltje, Growth of the stress-bearing and shape-maintaining murein sacculus of *Escherichia coli*. *Microbiol. Mol. Biol. Rev.* **62**, 181–203 (1998).
76. G. Klein, N. Kobylak, B. Lindner, A. Stupak, S. Raina, Assembly of lipopolysaccharide in *Escherichia coli* requires the essential LapB heat shock protein. *J. Biol. Chem.* **289**, 14829–14853 (2014).

77. M. M. Corsaro, R. Lanzetta, E. Parrilli, M. Parrilli, M. L. Tutino, S. Ummarino, Influence of growth temperature on lipid and phosphate contents of surface polysaccharides from the antarctic bacterium *Pseudoalteromonas haloplanktis* TAC 125. *J. Bacteriol.* **186**, 29–34 (2004).
78. H. Guo, T. Suzuki, J. L. Rubinstein, Structure of a bacterial atp synthase. *eLife* **8**, e43128 (2019).
79. J. B. Russell, G. M. Cook, Energetics of bacterial growth: Balance of anabolic and catabolic reactions. *Microbiol. Rev.* **59**, 48–62 (1995).
80. S. K. Sharma, P. De Los Rios, P. Christen, A. Lustig, P. Goloubinoff, The kinetic parameters and energy cost of the Hsp70 chaperone as a polypeptide unfoldase. *Nat. Chem. Biol.* **6**, 914–920 (2010).
81. A. S. Menon, L. Waxman, A. L. Goldberg, The energy utilized in protein breakdown by the ATP-dependent protease (La) from *Escherichia coli*\*. *J. Biol. Chem.* **262**, 722–726 (1987).
82. C. C. Lin, S. C. Su, M. Y. Su, P. H. Liang, C. C. Feng, S. H. Wu, C. I. Chang, Structural insights into the allosteric operation of the Lon AAA+ protease. *Structure* **24**, 667–675 (2016).
83. V. S. Cooper, A. F. Bennett, R. E. Lenski, Evolution of thermal dependence of growth rate of *Escherichia coli* populations during 20,000 generations in a constant environment. *Evolution* **55**, 889–896 (2001).
84. A. Rodríguez-Verdugo, D. Carrillo-Cisneros, A. González-González, B. S. Gaut, A. F. Bennett, Different tradeoffs result from alternate genetic adaptations to a common environment. *Proc. Natl. Acad. Sci. U.S.A.* **111**, 12121–12126 (2014).
85. R. E. Lenski, A. F. Bennett, Evolutionary response of *Escherichia coli* to thermal stress. *Am. Nat.* **142**, S47–64 (1993).
86. A. Untergasser, H. Nijveen, X. Rao, T. Bisseling, R. Geurts, J. A. M. Leunissen, Primer3Plus, an enhanced web interface to Primer3. *Nucleic Acids Res.* **35**, W71–W74 (2007).

87. J. Hellemans, G. Mortier, A. De Paepe, F. Speleman, J. Vandesompele, qBase relative quantification framework and software for management and automated analysis of real-time quantitative PCR data. *Genome Biol.* **8**, R19 (2008).
88. J. Vandesompele, K. De Preter, F. Pattyn, B. Poppe, N. Van Roy, A. De Paepe, F. Speleman, Accurate normalization of real-time quantitative RT-PCR data by geometric averaging of multiple internal control genes. *Genome Biol.* **3**, RESEARCH0034 (2002).
